# Evidence from imaging resilience genetics for a protective mechanism against schizophrenia in the ventral visual pathway

Meike D. Hettwer<sup>1,2</sup>, Thomas M. Lancaster<sup>3,4</sup>, Eva Raspor<sup>1</sup>, Peter K. Hahn<sup>1</sup>, Nina Roth Mota<sup>5,6</sup>, Wolf Singer<sup>7,8,9</sup>, Andreas Reif<sup>1</sup>, David E.J. Linden<sup>4,10</sup>, Robert A. Bittner<sup>1,7\*</sup>

<sup>1</sup> Department of Psychiatry, Psychosomatic Medicine, and Psychotherapy and Brain Imaging Center, University Hospital Frankfurt, Goethe University, Frankfurt am Main, Germany.

<sup>2</sup> Max Planck School of Cognition, Max Planck Institute for Human Cognitive and Brain Sciences (MPI CBS), Leipzig, Germany.

<sup>3</sup> School of Psychology, Bath University, Bath, UK.

<sup>4</sup> MRC Centre for Neuropsychiatric Genetics and Genomics, Division of Psychological Medicine and Clinical Neuroscience, School of Medicine, Cardiff University, Cardiff, UK.

<sup>5</sup> Department of Human Genetics, Radboud University Medical Center, Donders Institute for Brain, Cognition and Behaviour, Nijmegen, The Netherlands.

<sup>6</sup> Department of Psychiatry, Radboud University Medical Center, Donders Institute for Brain, Cognition and Behaviour, Nijmegen, The Netherlands.

<sup>7</sup> Ernst Strüngmann Institute for Neuroscience (ESI) in Cooperation with Max Planck Society, Frankfurt am Main, Germany.

<sup>8</sup> Max Planck Institute for Brain Research (MPI BR), Frankfurt am Main, Germany.

<sup>9</sup> Frankfurt Institute for Advanced Studies (FIAS), Frankfurt am Main, Germany.

<sup>10</sup> School for Mental Health and Neuroscience, Faculty of Health, Medicine and Life Sciences, Maastricht University, Maastricht, The Netherlands.

\* Corresponding author. Department of Psychiatry, Psychosomatic Medicine and Psychotherapy, University Hospital Frankfurt, Goethe University, Heinrich-Hoffmann-Str. 10, D-60528 Frankfurt am Main, Germany.

Phone: +49 69 6301 84713. Fax: +49 69 6301 81775.

Email: [bittner@med.uni-frankfurt.de](mailto:bittner@med.uni-frankfurt.de)

## 31 Abstract

32 Recently, the first genetic variants conferring resilience to schizophrenia have been  
33 identified. However, the neurobiological mechanisms underlying their protective effect  
34 remain unknown. Current models implicate adaptive neuroplastic changes in the visual  
35 system and their pro-cognitive effects in schizophrenia resilience. Here, we test the  
36 hypothesis that comparable changes can emerge from schizophrenia resilience genes. To  
37 this end, we used structural magnetic resonance imaging to investigate the effects of a  
38 schizophrenia polygenic resilience score ( $PRS_{Resilience}$ ) on cortical morphology (discovery  
39 sample:  $n=101$ ; UK Biobank replication sample:  $n=33,224$ ). We observed positive  
40 correlations between  $PRS_{Resilience}$  and cortical volume in the fusiform gyrus, a central hub  
41 within the ventral visual pathway. Our findings indicate that resilience to schizophrenia  
42 arises partly from genetically mediated enhancements of visual processing capacities for  
43 social and non-social object information. This implies an important role of visual  
44 information processing for mitigating schizophrenia risk, which might also be exploitable  
45 for early intervention studies.

## 49 Introduction

50 The effective prevention of schizophrenia depends on a clear understanding of both risk  
51 mechanisms and mechanisms of resilience, which confer protection from this debilitating  
52 disorder. The emerging field of resilience research promises to provide novel pathways  
53 toward improved treatment and prevention strategies for psychiatric disorders (1).

54 Resilience describes the phenomenon that many people with considerable exposure to risk  
55 factors for mental disorders retain good mental health (2–4). Importantly, current concepts  
56 regard resilience as a dynamic process facilitating adjustments to potentially disabling  
57 stressors, rather than as a trait or stable personality profile (3, 4). Nevertheless, there is  
58 clear evidence that resilience factors which contribute to resilience capacity (2, 3) may  
59 well be genetically determined (2, 5, 6).

60 Resilience research in schizophrenia needs to acknowledge its complex, decade-spanning  
61 pathophysiological trajectory prominently involving neurodevelopmental disturbances (7)  
62 and psychosocial stressors (8). Moreover, schizophrenia is a disorder of information  
63 processing (9) with pervasive deficits in a broad range of cognitive domains including  
64 perceptual impairments. Schizophrenia resilience mechanisms might thus act over  
65 prolonged periods at multiple premorbid stages and should likely affect cognition. The  
66 high heritability of schizophrenia (10) puts a particular emphasis on genetic mediators of  
67 resilience.

68 First successful attempts at addressing the genetic architecture of resilience (11) have  
69 recently identified single nucleotide polymorphisms (SNPs) moderating the penetrance of  
70 established common genetic risk factors (12). These SNPs are therefore not simply  
71 protective variants, i.e. the alternate alleles at risk loci, but rather variants independent  
72 from and orthogonal to risk variants, addressing the concern that resilience must not  
73 simply be defined as the flip side of vulnerability (2, 3). The resulting first polygenic  
74 resilience score ( $PRS_{Resilience}$ ) for schizophrenia (11) opens the opportunity to investigate  
75 how genes conferring resilience to schizophrenia influence neural systems to exert their  
76 protective effect.

77 Evidence for other schizophrenia resilience factors that could inform empirical research  
78 remains scarce. However, a valuable clue comes from epidemiological studies of patients

79 with congenital or early (C/E) blindness. People affected by this condition appear to have  
80 a reduced risk for developing schizophrenia (13, 14), a finding which was recently  
81 extended by the first whole-population-based study (15). This postulated protective effect  
82 appears to be specific to schizophrenia and does not extend to other forms of sensory loss  
83 including C/E deafblindness and blindness acquired later in life (13, 14). While this  
84 evidence should be regarded with caution due to the low base rates of both disorders (16),  
85 it has led several researchers to propose that C/E blindness might be a resilience factor for  
86 schizophrenia (13–15, 17, 18). Rather than to blindness per se, this has been attributed to  
87 adaptive reorganization of the visual system triggered by C/E blindness and concurrent  
88 improvements in cognitive functions that are impaired in schizophrenia (13, 14). C/E blind  
89 individuals show increased gray matter in visual areas within the inferior occipital,  
90 fusiform and lingual gyrus (19, 20). Yet, these profound changes only manifest in C/E  
91 blind but not in late blind individuals (19, 20), supporting the notion that only early  
92 reorganization of the visual system is protective for schizophrenia. The predictive coding  
93 theory of brain function (21, 22) provides a valuable framework for the interpretation of  
94 these findings. Converging evidence indicates that schizophrenia is characterized by a  
95 decreased precision and stability of internal high-level priors relative to sensory  
96 information. This provides a parsimonious account for important clinical and cognitive  
97 aspects of the disorder (18, 23). It has been argued that adaptive reorganization occurring  
98 in C/E blindness enhances the precision and stability of high-level and supramodal priors  
99 (18). The resulting greater primacy of priors relative to sensory data should facilitate  
100 resilience to schizophrenia. Together, these findings and models raise the question,  
101 whether similar but more subtle changes of the visual system exerting a weaker protective  
102 effect could also occur as a form of genetically mediated natural variation in sighted  
103 individuals.

104 The involvement of the visual system in schizophrenia resilience mechanisms is also  
105 implied by the prominent visual perceptual impairments featured in the disorder. They  
106 encompass basic deficits in visual acuity and contrast sensitivity and subsequent  
107 disturbances of perceptual organization (24). Visual impairments also perturb higher-order  
108 cognitive functions (25, 26) and constitute a strong predictor of psychosis transition in  
109 high-risk individuals (27) and poor functional outcome in patients (28, 29). Notably,  
110 abnormalities in both the dorsal and ventral visual pathway have been implicated (24, 30).  
111 The visual brain and its two major subsystems thus emerge as promising targets in the  
112 search for resilience-promoting mechanisms. This approach partly builds upon a  
113 successful strategy for risk research in neuropsychiatric disorders. Genetic studies indicate  
114 that rare but highly penetrant risk factors can inform us about the neurobiological  
115 consequences of common genetic risk factors, which despite their lower penetrance tend  
116 to affect the same pathophysiological pathways (31). C/E blindness as a potential, rare  
117 resilience factor with a profound impact on the brain could thus point to similar but less  
118 penetrant mechanisms of common resilience factors. Accordingly, SNPs conferring  
119 resilience to schizophrenia might exert their protective influence partly by affecting  
120 neuroplasticity in the dorsal and ventral visual pathways. To test this hypothesis and to  
121 investigate the involvement of the visual system in schizophrenia resilience mechanisms,

122 we conducted an imaging genetics study using structural magnetic resonance imaging  
123 (MRI) in healthy participants.

## 125 Results

### 126 Impact of polygenic resilience on cortical volume

127 Our imaging genetics approach investigating the effects of  $PRS_{Resilience}$  on brain structural  
128 parameters in 101 healthy participants revealed a positive whole-brain correlation between  
129  $PRS_{Resilience}$  and cortical volume in the right fusiform gyrus (FFG) after correction for  
130 multiple comparisons (MNI: X = 33.7; Y = -51.4, Z = -16.4; cluster size: 338.1 mm<sup>2</sup>;  $r =$   
131 0.35; cluster-wise  $p = .0004$ ; Fig. 1A). This cluster mapped directly on the mid-fusiform  
132 sulcus (MFS; See Fig. 1 and Fig. S1) and showed a partial overlap with the fusiform face  
133 area (FFA) (32). After extracting the corresponding values from the cluster in the fusiform  
134 gyrus we found that  $PRS_{Resilience}$  was significantly correlated with surface area ( $r = 0.35$ ,  
135  $p < .001$ ; Fig. 1B) but not with cortical thickness ( $r = 0.14$ ,  $p = .17$ ; Fig. 1C). We further  
136 observed an impact of  $PRS_{Resilience}$  on left FFG volume at the initial CFT ( $p < .001$ ), which,  
137 however, did not survive multiple comparisons correction (cluster-wise  $p > .05$ ) (see Fig.  
138 S2). There was no significant correlation between  $PRS_{Resilience}$  and either surface area or  
139 cortical thickness at the whole-brain level.

### 141 Findings from replication analysis in a UK Biobank sample

142 Because the findings in our discovery sample suggested a bilateral effect in the FFG  
143 which we could not fully confirm due to a lack of statistical power, our replication  
144 analysis focused on left and right FFG parcels (33) (Fig. 2A). In the UK Biobank sample,  
145 we observed a significant effect of  $PRS_{Resilience}$  on cortical volume ( $p = .006$ ) and surface  
146 area ( $p = .026$ ) in the left FFG, which was not present in the right FFG ( $p_{volume} = .208$ ;  
147  $p_{surface\ area} = .343$ ). Mirroring the discovery sample,  $PRS_{Resilience}$  did not impact cortical  
148 thickness (see Fig. 2B).

## 150 Discussion

151 We investigated the neuroanatomical correlates of common genetic variants associated  
152 with increased resilience to schizophrenia using structural MRI. We observed a positive  
153 correlation between  $PRS_{Resilience}$  and cortical volume in the right FFG, a key component of  
154 the ventral visual pathway. In the replication sample, we observed a correlation between  
155 global left FFG volume and  $PRS_{Resilience}$ , which mirrors the cluster in the left FFG in the  
156 discovery sample that did not survive multiple comparisons correction. Involvement of the  
157 ventral visual pathway therefore appears not to be specific to one hemisphere. This is in  
158 line with evidence that both hemispheres – while independently analyzing half of the  
159 visual scene – combine their resources to jointly process objects at the fovea (34).  
160 Resilience to schizophrenia thus appears to result from a general increase in ventral visual  
161 pathway processing resources. These findings provide the first direct evidence for a  
162 schizophrenia resilience mechanism involving the visual system in line with existing  
163 models derived from C/E blindness research. Understanding the mechanisms underlying  
164 its protective effect requires a detailed assessment of the role of the FFG within the ventral  
165 visual pathway.

166 The ventral visual pathway is primarily involved in object recognition and categorization  
167 (35, 36). Along this pathway, the FFG is an important relay between low level visual areas

168 in the occipital lobe and areas in the infero-temporal cortex and para-hippocampal gyrus  
169 (35), which are considered the top levels in the visual processing hierarchy. Importantly,  
170 all areas of the ventral stream from the primary visual cortex all the way up to the infero-  
171 temporal cortex are reciprocally connected via feed-forward and feed-back connections,  
172 communicating in parallel within various functional networks (35, 37). The cluster  
173 observed in our discovery sample mapped directly onto the right MFS. This sulcus divides  
174 the FFG into a lateral and medial part, the two moieties differing in cyto- and receptor-  
175 architectonics as well as their connectivity profiles within the VTC (38). The MFS further  
176 forms the central axis of multiple lateral-to-medial functional gradients across the VTC.  
177 These gradients relate to the eccentricity of the represented visual field, the size of objects,  
178 their animacy and domain specificity (36, 39). Described characteristics are indicative for  
179 the coexistence of functional networks devoted to the preferential processing of object  
180 categories (36). The increased volume of both moieties of the FFG as observed in our data  
181 might thus be indicative of a global enhancement of functions facilitating the parallel  
182 processing of complementary aspects of visual information (34). In the context of  
183 predictive coding (21), this could imply greater resources for the disambiguation of  
184 sensory evidence by capitalizing on the priors stored in the functional architecture of the  
185 different processing streams. Notably, patients with schizophrenia are impaired in their  
186 ability to use stored knowledge for the interpretation of sensory evidence (23).  
187 Consequently, the embedding of sensory evidence in the context of a priori knowledge is  
188 disturbed. A larger FFG could compensate for disturbances that impede prior based  
189 evaluation of sensory information. This interpretation is well in line with the notion that  
190 greater reliability of high-level priors might be protective against schizophrenia (18).

191 Considering potential pro-cognitive effects of these adaptations, increased FFG volume  
192 may further contribute positively to resilience capacities through its involvement in  
193 interpersonal communication and social cognition (39, 40). Our cluster showed  
194 considerable overlap with the right FFA, the two subdivisions of which are located  
195 approximately at anterior and posterior ends of the MFS (36, 38). The FFA is essential for  
196 the processing of face-related information including the decoding of facial components for  
197 affect discrimination (39) and an important perceptual node of social cognitive networks  
198 (40). In schizophrenia, reduced FFG volume acts as a structural neural substrate of various  
199 perceptual and affective processing deficits associated with impaired social cognition and  
200 reduced extraversion (41–44). Importantly, perceptual deficits such as difficulties to  
201 decode complex facial configurations accompany and likely precede aberrant cognitive  
202 and affective processing in impaired social cognition (40, 41, 43). FFG volume further  
203 contributes reliably to discriminative predictive patterns of social functioning and  
204 psychosis transition in high-risk individuals (45, 46). Our data indicate that genetically  
205 mediated resilience mechanisms involving the FFA might increase social perceptual  
206 processing capacities. This hypothesis is supported by reports of increased FFG volume in  
207 healthy subjects after social cognitive training (47). Furthermore, larger FFG volume in  
208 patients with schizophrenia appears to mediate the beneficial effects of cognitive training  
209 on general neurocognition and social cognition in particular (48). Together, these findings  
210 underscore that FFG volume increase is indeed associated with enhanced cognitive  
211 capabilities in multiple domains. They are also compatible with the role of the FFG as a  
212 central relay between low level visual and higher cognitive areas in support of a wide  
213 array of non-social and social cognitive processes.

214 A crucial role of social cognition for resilience to schizophrenia is conceivable, as it  
215 constitutes a major predictor of functional outcome (40) and can compensate for the  
216 deleterious effects of neurocognitive deficits on daily life (49). A positive link between  
217 FFG volume and extraversion (50) further suggests an increased likelihood of beneficial



218 social interactions and quality of life (51). Together, these observations indicate that FFG  
219 related resilience mechanisms enhance cognitive functions which facilitate the embedding  
220 of individuals in their social environment, thus buffering against some of the effects of  
221 psychosocial stressors.

222 Expanded computational resources in the ventral visual pathway and resulting broad  
223 cognitive benefits should also facilitate coping with stressors arising from sensory deficits.  
224 Typically, resilience models emphasize the ability to cope with stressors such as  
225 challenging life circumstances and physical illness (1, 3). However, perturbed visual  
226 information processing in schizophrenia might in itself constitute a stressor. Characteristic  
227 disturbances comprise a lower threshold for sensory overload (52), visual distortions (52,  
228 53), reduced predictability of changes in the environment and resulting uncertainty  
229 regarding adequate behavior (18) as well as psychotic experiences (54). These in turn have  
230 detrimental effects on adaptive behavior and interpersonal interactions, together  
231 constituting a fundamental stressor. Given the widespread deleterious impact of stress on  
232 cognition (55), this might lead to a vicious cycle of increasing psychosocial stress,  
233 aberrant information processing and psychosis proneness (56). Through increased  
234 perceptual and cognitive capabilities, the resilience mechanisms implied by our data  
235 should reduce stress induced by subtle cognitive impairments and increase the chances of  
236 interrupting this vicious cycle. It remains to be clarified in future studies whether  
237 increased FFG resources promote a resilience mechanism that directly antagonizes  
238 potential cognitive disturbances or rather mitigates cognitive deficits by compensating for  
239 disease related abnormalities. The latter would be consistent with the idea that, on the  
240 neurobiological level, resilience does not simply reverse pathophysiological processes but  
241 rather ameliorates the harmful consequences of stressors (1).

242 Overall, our findings point towards a central role of visual cognition in schizophrenia  
243 resilience as both a stressor and a coping mechanism. Furthermore, our results imply a  
244 crucial link between the information processing disorder concept and the vulnerability-  
245 stress model (8, 9, 56) in the context of schizophrenia resilience genetics. Interestingly,  
246 there is preliminary evidence for an involvement of the FFG and neighboring occipito-  
247 temporal areas in resilience against stress and adverse life events (57), trauma (58), and  
248 bipolar disorder (59), emphasizing the potential transdiagnostic relevance of visual  
249 cognition in coping mechanisms.

250 Lastly, our data creates an interesting link to resilience models derived from C/E blindness  
251 research. They suggest that SNPs associated with resilience to schizophrenia can drive  
252 some of the neuroplastic changes in visual areas that are also observed in early  
253 reorganization following C/E blindness (19, 20). The apparent convergence of such widely  
254 different biological mechanisms on a similar intermediate phenotype underscores the  
255 significance of the visual brain for schizophrenia resilience research. Importantly, this also  
256 raises the possibility that similar protective adaptations might be inducible through  
257 targeted interventions (54). However, such interventions would have to occur at early  
258 stages of post-natal development when the visual system is susceptible to environmental  
259 influences (60). This is suggested by the lack of a protective effect in late blindness (14),  
260 the early start and prolonged trajectory of abnormal neurodevelopment in schizophrenia  
261 (7) as well as the early manifestation of visual dysfunction in at-risk populations (61).

262 Our findings provide a novel direction for schizophrenia resilience research by  
263 demonstrating that resilience to the disorder might arise from genetic influences that act  
264 on neural systems subserving elementary cognitive processes. However, the indirect  
265 nature of the current evidence is an important limitation of our study. The cognitive  
266 implications of our findings can so far only be inferred from existing evidence for an

267 association of FFG volume and cognition and the crucial functional role of the FFG within  
268 the ventral visual pathway. Conversely, we did not directly investigate the cognitive  
269 effects of PRS<sub>Resilience</sub>. Furthermore, the current imaging genetics approach cannot provide  
270 evidence that individuals with higher PRS<sub>Resilience</sub> would indeed be more adaptable to the  
271 specific stressors implicated by our findings. These questions need to be addressed in  
272 future studies.

273 In conclusion, our study contributes to models of schizophrenia resilience by  
274 demonstrating an impact of genetic variants conferring protection from the disorder on  
275 local brain structure in the visual system. Improved cognitive and functional capacities  
276 that may result from these effects suggest a resilience mechanism linked to coping with  
277 both the cognitive and psychosocial sequelae of stressors. Future studies should  
278 investigate directly the individual contributions of the cognitive processes implicated by  
279 our findings to schizophrenia resilience in healthy subjects and at-risk populations.  
280 Moreover, it will be imperative to investigate the interaction between genetic and  
281 environmental risk factors with resilience factors in order to fully realize the potential of  
282 the presented resilience paradigm for the discovery of novel course-modifying and  
283 preventive interventions for schizophrenia.

## 285 **Methods and Materials**

### 286 Participants

287 All subjects gave their written consent to participate in the study. The ethical review board  
288 of the Faculty of Medicine at Goethe University Frankfurt granted ethics approval. We  
289 obtained structural MRI and genetic data from 105 right-handed subjects with normal or  
290 corrected to normal vision and no family or personal history of psychiatric disorders ,  
291 according to the German Version of the SCID-I questionnaire for DSM-IV (62).  
292 Handedness was measured with the Edinburgh Handedness Inventory (63) and IQ was  
293 determined using the MWT-B (64). We excluded four subjects due to excessive head  
294 motion during scanning (n=1) or substantial reconstruction errors during MRI processing  
295 (n=3), resulting in 101 subjects for the analysis (55 female; Mean age: 26.3 ± 4.71 years).

### 297 Genotyping

298 We collected venous blood samples for DNA extraction. Genotyping was performed using  
299 custom Illumina HumanCoreExome-24 BeadChip genotyping arrays, which contain  
300 570,038 genetic variants (Illumina, Inc., San Diego, CA). The Rapid Imputation and  
301 Computational Pipeline (RICOPILI; (65)) was used for quality control, principal  
302 component analysis and imputation. Individuals were excluded for ambiguous sex, cryptic  
303 relatedness up to third degree relatives by identity of descent, genotyping completeness <  
304 99 %, and non-European ethnicity admixture. SNPs were excluded where the minor allele  
305 frequency was < 1 %, if the call rate was < 99 % or if the  $\chi^2$ -test for Hardy-Weinberg  
306 Equilibrium had a p-value < 1 e-06. Before imputation, we assessed genetic homogeneity  
307 in each sample using multi-dimensional scaling (MDS) analysis. We excluded ancestry  
308 outliers through visual inspection of the first two components.

### 310 Calculation of polygenic resilience scores

311 We calculated schizophrenia PRS<sub>Resilience</sub> based on resilience loci identified by Hess et al.  
312 (11), who included 3786 high-risk resilient individuals and 18,619 patients at equal

polygenic risk in their initial discovery sample. Calculations of polygenic scores were performed according to previously described protocols with PRSice software (v. 2.2.8; (66)). Following the established PGC protocol (67), polygenic scores were clumped using linkage disequilibrium (LD) and distance thresholds of  $r^2 = 0.2$ , within a 500 kb window. The [major histocompatibility complex](#) (MHC) region was excluded due to high LD (67). We calculated PRS<sub>Resilience</sub> based on SNPs thresholded at  $p < 0.05$  (number of SNPs = 7818) because, among nominally significant PRS<sub>Resilience</sub> reported, SNPs included at this threshold were shown to explain the most variance (11).

### MRI data acquisition and processing

We acquired structural MRI data on a 3T Trio MR-scanner (Siemens, Erlangen, Germany) using a high-resolution T1-weighted Modified Driven Equilibrium Fourier Transform (MDEFT) sequence (68) (voxel size: 1 x 1 x 1 mm<sup>3</sup>; TR = 7.92; TE = 2.4; TI = 910 ms; FOV = 256 x 256 mm<sup>2</sup>; number of slices per volume = 176; flip angle = 15°, slice thickness = 1 mm). Head motion was minimized by pillows.

We used FreeSurfer (version 6.0.1; <http://surfer.nmr.mgh.harvard.edu>) for semi-automated preprocessing and surface reconstruction, using bias-corrected T1-weighted anatomical scans as the input (See Supplementary Materials). Surface reconstructions were manually checked and corrected following the editing guidelines provided on the FreeSurferWiki (<http://freesurfer.net/fswiki/Edits>). Measures of cortical thickness, cortical volume and surface area were computed using the algorithms readily available in FreeSurfer software (69). Surface maps were smoothed using a surface-based 10-mm full-width-half-maximum smoothing kernel.

### Statistical Group Analysis

Three general linear models (GLMs) were applied at each vertex to estimate the relationship between PRS<sub>Resilience</sub> and three anatomical parameters: Cortical thickness, cortical volume, and surface area. Total intracranial volume (ICV) and age were included as covariates in partial correlation analyses. PRS<sub>Resilience</sub>, age and ICV were demeaned to allow for better model fit. To correct for multiple comparisons, we used surface-based cluster-size exclusion as implemented in FreeSurfer (70). We applied the recommended initial cluster-forming threshold (CFT) ( $p < .001$ ) and performed Monte Carlo simulations (10 000 iterations; cluster-wise  $p < .05$ , adjusted for testing the two hemispheres separately, i.e.  $p < .025$ ). These statistical parameters have been shown to protect sufficiently from type 1 errors (71).

### UK Biobank Replication Analysis

To test the replicability of our findings, we performed additional analyses in a UK Biobank general population sample (72). Here, we used only the summary statistics for the traits. This polygenic score approach utilizes the well-established ‘gtx’ method (73, 74), which is equivalent to the “inverse variance weighted” approach in MRI studies. However, in a polygenic score analysis there are no stringent inclusion criteria for genetic variants: we do not require the variants to be strongly associated with the disease and pleiotropic effects are allowed. We tested the association between PRS<sub>Resilience</sub> and fusiform gyrus metrics (surface area, thickness, volume). The analysis was based on genome wide association studies (GWAS) summary statistics



359 (<https://open.win.ox.ac.uk/ukbiobank/big40/pheweb33k/phenotypes/>) in a sample  
360 comprising 33,224 individuals available for Desikan-Killiany parcels (33). All GWAS  
361 summary data was corrected for demographic and genetic confounds (75).  $PRS_{Resilience}$   
362 were created using PRSice v1.25 risk profile software (66) with a stringent clumping  
363 procedure [clump.kb = 1000 kb, clump.r2 = 0.01] to remove correlated alleles. SNPs in  
364 the [1000 Genomes Project](#) (phase 3) were used as reference data. We included SNPs  
365 thresholded at  $p < 0.05$  from the schizophrenia resilience GWAS (11). Variants within the  
366 MHC were removed from data (chr 6: 26,000–34,000 kb).

367 **References**

368

- 369 1. A. Feder, S. Fred-Torres, S. M. Southwick, D. S. Charney, *The Biology of Human*  
370 *Resilience: Opportunities for Enhancing Resilience Across the Life Span*. *Biol.*  
371 *Psychiatry*. 86, 443–453 (2019).
- 372 2. K. W. Choi, M. B. Stein, E. C. Dunn, K. C. Koenen, J. W. Smoller, *Genomics and*  
373 *psychological resilience: a research agenda*. *Mol. Psychiatry*. 24, 1770–1778 (2019).
- 374 3. R. Kalisch, D. G. Baker, U. Basten, M. P. Boks, G. A. Bonanno, E. Brummelman, A.  
375 Chmitorz, G. Fernández, C. J. Fiebach, I. Galatzer-Levy, E. Geuze, S. Groppa, I.  
376 Helmreich, T. Hendler, E. J. Hermans, T. Jovanovic, T. Kubiak, K. Lieb, B. Lutz, M. B.  
377 Müller, R. J. Murray, C. M. Nievergelt, A. Reif, K. Roelofs, B. P. F. Rutten, D. Sander, A.  
378 Schick, O. Tüscher, I. Van Diest, A. L. Van Harmelen, I. M. Veer, E. Vermetten, C. H.  
379 Vinkers, T. D. Wager, H. Walter, M. Wessa, M. Wibrals, B. Kleim, *The resilience*  
380 *framework as a strategy to combat stress-related disorders*. *Nat. Hum. Behav.* 1, 784–790  
381 (2017).
- 382 4. G. S. Malhi, P. Das, E. Bell, G. Mattingly, Z. Mannie, *Modelling resilience in adolescence*  
383 *and adversity: a novel framework to inform research and practice*. *Transl. Psychiatry*. 9,  
384 316 (2019).
- 385 5. A. B. Amstadter, J. M. Myers, K. S. Kendler, *Psychiatric resilience: Longitudinal twin*  
386 *study*. *Br. J. Psychiatry*. 205, 275–280 (2014).
- 387 6. A. P. Wingo, L. M. Almli, J. S. Stevens, T. Jovanovic, T. S. Wingo, G. Tharp, Y. Li, A.  
388 Lori, M. Briscione, P. Jin, E. B. Binder, B. Bradley, G. Gibson, K. J. Ressler, *Genome-*  
389 *wide association study of positive emotion identifies a genetic variant and a role for*  
390 *microRNAs*. *Mol. Psychiatry*. 22, 774–783 (2017).
- 391 7. S. Marenco, D. R. Weinberger, *The neurodevelopmental hypothesis of schizophrenia:*  
392 *Following a trail of evidence from cradle to grave*. *Dev. Psychopathol.* 12, 501–527  
393 (2000).
- 394 8. K. H. Nuechterlein, *Vulnerability / Stress Model of Schizophrenic Episodes*. *Schizophr.*  
395 *Bull.* 10, 300–312 (1982).
- 396 9. K. H. Nuechterlein, M. E. Dawson, M. F. Green, *Information-processing abnormalities as*  
397 *neuropsychological vulnerability indicators for schizophrenia*. *Acta Psychiatr. Scand.* 90,  
398 71–79 (1994).
- 399 10. R. Hilker, D. Helenius, B. Fagerlund, A. Skytthe, K. Christensen, T. M. Werge, M.  
400 Nordentoft, B. Glenthøj, *Heritability of Schizophrenia and Schizophrenia Spectrum Based*  
401 *on the Nationwide Danish Twin Register*. *Biol. Psychiatry*. 83, 492–498 (2018).
- 402 11. J. L. Hess, D. S. Tylee, M. Mattheisen, A. D. Børglum, T. D. Als, J. Grove, T. Werge, P.  
403 B. Mortensen, O. Mors, M. Nordentoft, D. M. Hougaard, J. Byberg-Grauholm, M.  
404 Bækvad-Hansen, T. A. Greenwood, M. T. Tsuang, D. Curtis, S. Steinberg, E. Sigurdsson,  
405 H. Stefánsson, K. Stefánsson, H. J. Edenberg, P. Holmans, S. V. Faraone, S. J. Glatt, *A*  
406 *polygenic resilience score moderates the genetic risk for schizophrenia*. *Mol. Psychiatry*.  
407 26, 800–815 (2021).
- 408 12. A. F. Pardiñas, P. Holmans, A. J. Pocklington, V. Escott-Price, S. Ripke, N. Carrera, S. E.  
409 Legge, S. Bishop, D. Cameron, M. L. Hamshere, J. Han, L. Hubbard, A. Lynham, K.  
410 Mantripragada, E. Rees, J. H. MacCabe, S. A. McCarroll, B. T. Baune, G. Breen, E. M.  
411 Byrne, U. Dannlowski, T. C. Eley, C. Hayward, N. G. Martin, A. M. McIntosh, R. Plomin,

- 412 D. J. Porteous, N. R. Wray, A. Caballero, D. H. Geschwind, L. M. Huckins, D. M.  
413 Ruderfer, E. Santiago, P. Sklar, E. A. Stahl, H. Won, E. Agerbo, T. D. Als, O. A.  
414 Andreassen, M. Bækvad-Hansen, P. B. Mortensen, C. B. Pedersen, A. D. Børglum, J.  
415 Bybjerg-Grauholm, S. Djurovic, N. Durmishi, M. G. Pedersen, V. Golimbet, J. Grove, D.  
416 M. Hougaard, M. Mattheisen, E. Molden, O. Mors, M. Nordentoft, M. Pejovic-  
417 Milovancevic, E. Sigurdsson, T. Silagadze, C. S. Hansen, K. Stefansson, H. Stefansson, S.  
418 Steinberg, S. Tosato, T. Werge, D. Harold, R. Sims, A. Gerrish, J. Chapman, R. Abraham,  
419 P. Hollingworth, J. Pahwa, N. Denning, C. Thomas, S. Taylor, J. Powell, P. Proitsi, M.  
420 Lupton, S. Lovestone, P. Passmore, D. Craig, B. McGuinness, J. Johnston, S. Todd, W.  
421 Maier, F. Jessen, R. Heun, B. Schurmann, A. Ramirez, T. Becker, C. Herold, A. Lacour,  
422 D. Dricchel, M. Nothen, A. Goate, C. Cruchaga, P. Nowotny, J. C. Morris, K. Mayo, M.  
423 O'Donovan, M. Owen, J. Williams, E. Achilla, C. L. Barr, T. W. Böttger, D. Cohen, S.  
424 Curran, E. Dempster, D. Dima, R. Sabes-Figuera, R. J. Flanagan, S. Frangou, J. Frank, C.  
425 Gasse, F. Gaughran, I. Giegling, E. Hannon, A. M. Hartmann, B. Heißenrath, M. Helthuis,  
426 H. T. Horsdal, O. Ingimarsson, K. Jollie, J. L. Kennedy, O. Köhler, B. Konte, M. Lang, C.  
427 Lewis, J. MacCaba, A. K. Malhotra, P. McCrone, S. M. Meier, J. Mill, M. M. Nöthen, C.  
428 B. Pedersen, M. Rietschel, D. Rujescu, A. Schwalber, H. J. Sørensen, B. Spencer, H.  
429 Støvring, J. Strohmaier, P. Sullivan, E. Vassos, M. Verbelen, D. A. Collier, G. Kirov, M.  
430 J. Owen, M. C. O'Donovan, J. T. R. Walters, Common schizophrenia alleles are enriched  
431 in mutation-intolerant genes and in regions under strong background selection. *Nat. Genet.*  
432 50, 381–389 (2018).
- 433 13. E. Leivada, C. Boeckx, Schizophrenia and cortical blindness: Protective effects and  
434 implications for language. *Front. Hum. Neurosci.* 8, 1–12 (2014).
- 435 14. S. M. Silverstein, Y. Wang, B. P. Keane, Cognitive and Neuroplasticity Mechanisms by  
436 Which Congenital or Early Blindness May Confer a Protective Effect Against  
437 Schizophrenia. *Front. Psychol.* 3, 1327–1328 (2013).
- 438 15. V. A. Morgan, M. Clark, J. Crewe, G. Valuri, D. A. Mackey, J. C. Badcock, A. Jablensky,  
439 Congenital blindness is protective for schizophrenia and other psychotic illness. A whole-  
440 population study. *Schizophr. Res.* 202, 414–416 (2018).
- 441 16. O. H. Jepsen, L. V. Petersen, T. Bek, S. D. Østergaard, Is Early Blindness Protective of  
442 Psychosis or Are We Turning a Blind Eye to the Lack of Statistical Power? *Schizophr.*  
443 *Bull.* 46, 1335–1336 (2020).
- 444 17. S. Landgraf, M. Osterheider, “To see or not to see: that is the question.” The “Protection-  
445 Against-Schizophrenia” (PaSZ) model: evidence from congenital blindness and visuo-  
446 cognitive aberrations. *Front. Psychol.* 4, 1–23 (2013).
- 447 18. T. A. Pollak, P. R. Corlett, Blindness, Psychosis, and the Visual Construction of the  
448 World. *Schizophr. Bull.* 46, 1418–1425 (2019).
- 449 19. P. Voss, B. G. Pike, R. J. Zatorre, Evidence for both compensatory plastic and disuse  
450 atrophy-related neuroanatomical changes in the blind. *Brain.* 137, 1224–1240 (2014).
- 451 20. H. J. Park, J. D. Lee, E. Y. Kim, B. Park, M. K. Oh, S. C. Lee, J. J. Kim, Morphological  
452 alterations in the congenital blind based on the analysis of cortical thickness and surface  
453 area. *Neuroimage.* 47, 98–106 (2009).
- 454 21. K. Friston, A theory of cortical responses. *Philos. Trans. R. Soc. B Biol. Sci.* 360, 815–  
455 836 (2005).

- 456 22. R. P. N. Rao, D. H. Ballard, Predictive coding in the visual cortex: a functional  
457 interpretation of some extra-classical receptive-field effects. *Nat. Neurosci.* 2, 79–87  
458 (1999).
- 459 23. P. Sterzer, R. A. Adams, P. Fletcher, C. Frith, S. M. Lawrie, L. Muckli, P. Petrovic, P.  
460 Uhlhaas, M. Voss, P. R. Corlett, The Predictive Coding Account of Psychosis. *Biol.*  
461 *Psychiatry.* 84, 634–643 (2018).
- 462 24. P. D. Butler, S. M. Silverstein, S. C. Dakin, Visual Perception and Its Impairment in  
463 Schizophrenia. *Biol. Psychiatry.* 64, 40–47 (2008).
- 464 25. C. Haenschel, R. A. Bittner, F. Haertling, A. Rotarska-Jagiela, K. Maurer, W. Singer, D.  
465 E. J. Linden, Contribution of Impaired Early-Stage Visual Processing to Working Memory  
466 Dysfunction in Adolescents With Schizophrenia. *Arch. Gen. Psychiatry.* 64, 1229 (2007).
- 467 26. R. A. Bittner, D. E. J. Linden, A. Roebroek, F. Härtling, A. Rotarska-Jagiela, K. Maurer,  
468 R. Goebel, W. Singer, C. Haenschel, The When and Where of Working Memory  
469 Dysfunction in Early-Onset Schizophrenia—A Functional Magnetic Resonance Imaging  
470 Study. *Cereb. Cortex.* 25, 2494–2506 (2015).
- 471 27. E. W. Schubert, K. M. Henriksson, T. F. McNeil, A prospective study of offspring of  
472 women with psychosis: visual dysfunction in early childhood predicts schizophrenia-  
473 spectrum disorders in adulthood. *Acta Psychiatr. Scand.* 112, 385–393 (2005).
- 474 28. M. F. Green, G. Helleman, W. P. Horan, J. Lee, J. K. Wynn, From perception to  
475 functional outcome in schizophrenia: modeling the role of ability and motivation. *Arch.*  
476 *Gen. Psychiatry.* 69, 1216–24 (2012).
- 477 29. Y. Rassovsky, W. P. Horan, J. Lee, M. J. Sergi, M. F. Green, Pathways between early  
478 visual processing and functional outcome in schizophrenia. *Psychol. Med.* 41, 487–97  
479 (2011).
- 480 30. Y. Deng, K. Liu, D. Cheng, J. Zhang, H. Chen, B. Chen, Y. Li, W. Wang, Y. Kong, G.  
481 Wen, Ventral and dorsal visual pathways exhibit abnormalities of static and dynamic  
482 connectivities, respectively, in patients with schizophrenia. *Schizophr. Res.* 206, 103–110  
483 (2019).
- 484 31. K. E. Tansey, E. Rees, D. E. Linden, S. Ripke, K. D. Chambert, J. L. Moran, S. A.  
485 McCarroll, P. Holmans, G. Kirov, J. Walters, M. J. Owen, M. C. O’Donovan, Common  
486 alleles contribute to schizophrenia in CNV carriers. *Mol. Psychiatry.* 21, 1085–1089  
487 (2016).
- 488 32. N. Kanwisher, J. McDermott, M. M. Chun, The Fusiform Face Area: A Module in Human  
489 Extrastriate Cortex Specialized for Face Perception. *J. Neurosci.* 17, 4302–4311 (1997).
- 490 33. R. S. Desikan, F. Ségonne, B. Fischl, B. T. Quinn, B. C. Dickerson, D. Blacker, R. L.  
491 Buckner, A. M. Dale, R. P. Maguire, B. T. Hyman, M. S. Albert, R. J. Killiany, An  
492 automated labeling system for subdividing the human cerebral cortex on MRI scans into  
493 gyral based regions of interest. *Neuroimage.* 31, 968–980 (2006).
- 494 34. G. A. Rousselet, S. J. Thorpe, M. Fabre-Thorpe, How parallel is visual processing in the  
495 ventral pathway? *Trends Cogn. Sci.* 8, 363–370 (2004).
- 496 35. D. J. Kravitz, K. S. Saleem, C. I. Baker, L. G. Ungerleider, M. Mishkin, The ventral visual  
497 pathway: an expanded neural framework for the processing of object quality. *Trends*  
498 *Cogn. Sci.* 17, 26–49 (2013).

- 499 36. K. Grill-Spector, K. S. Weiner, The functional architecture of the ventral temporal cortex  
500 and its role in categorization. *Nat. Rev. Neurosci.* 15, 536–548 (2014).
- 501 37. N. T. Markov, H. Kennedy, The importance of being hierarchical. *Curr. Opin. Neurobiol.*  
502 23, 187–194 (2013).
- 503 38. K. S. Weiner, The Mid-Fusiform Sulcus ( sulcus sagittalis gyri fusiformis ). *Anat. Rec.*  
504 302, 1491–1503 (2019).
- 505 39. N. Kanwisher, G. Yovel, The fusiform face area: a cortical region specialized for the  
506 perception of faces. *Philos. Trans. R. Soc. B Biol. Sci.* 361, 2109–2128 (2006).
- 507 40. M. F. Green, W. P. Horan, J. Lee, Social cognition in schizophrenia. *Nat. Rev. Neurosci.*  
508 16, 620–631 (2015).
- 509 41. Y. Chen, T. Ekstrom, Visual and Associated Affective Processing of Face Information in  
510 Schizophrenia: A Selective Review. *Curr. Psychiatry Rev.* 11, 266–272 (2015).
- 511 42. A. E. Pinkham, J. B. Hopfinger, K. A. Pelphrey, J. Piven, D. L. Penn, Neural bases for  
512 impaired social cognition in schizophrenia and autism spectrum disorders. *Schizophr. Res.*  
513 99, 164–175 (2008).
- 514 43. D. C. Javitt, When doors of perception close: Bottom-up models of disrupted cognition in  
515 schizophrenia. *Annu. Rev. Clin. Psychol.* 5, 249–275 (2009).
- 516 44. T. Onitsuka, M. A. Niznikiewicz, K. M. Spencer, M. Frumin, N. Kuroki, L. C. Lucia, M.  
517 E. Shenton, R. W. McCarley, Functional and structural deficits in brain regions subserving  
518 face perception in schizophrenia. *Am. J. Psychiatry.* 163, 455–62 (2006).
- 519 45. N. Koutsouleris, L. Kambaitz-Ilankovic, S. Ruhrmann, M. Rosen, A. Ruef, D. B. Dwyer,  
520 M. Paolini, K. Chisholm, J. Kambaitz, T. Haidl, A. Schmidt, J. Gillam, F. Schultze-Lutter,  
521 P. Falkai, M. Reiser, A. Riecher-Rössler, R. Upthegrove, J. Hietala, R. K. R. Salokangas,  
522 C. Pantelis, E. Meisenzahl, S. J. Wood, D. Beque, P. Brambilla, S. Borgwardt, Prediction  
523 Models of Functional Outcomes for Individuals in the Clinical High-Risk State for  
524 Psychosis or with Recent-Onset Depression: A Multimodal, Multisite Machine Learning  
525 Analysis. *JAMA Psychiatry.* 75, 1156–1172 (2018).
- 526 46. S. de Wit, T. B. Ziermans, M. Nieuwenhuis, P. F. Schothorst, H. van Engeland, R. S.  
527 Kahn, S. Durston, H. G. Schnack, Individual prediction of long-term outcome in  
528 adolescents at ultra-high risk for psychosis: Applying machine learning techniques to  
529 brain imaging data. *Hum. Brain Mapp.* 38, 704–714 (2017).
- 530 47. B. Kreifelts, H. Jacob, C. Brück, M. Erb, T. Ethofer, D. Wildgruber, Non-verbal emotion  
531 communication training induces specific changes in brain function and structure. *Front.*  
532 *Hum. Neurosci.* 7, 648 (2013).
- 533 48. S. M. Eack, G. E. Hogarty, R. Y. Cho, K. M. R. Prasad, D. P. Greenwald, S. S. Hogarty,  
534 M. S. Keshavan, Neuroprotective Effects of Cognitive Enhancement Therapy Against  
535 Gray Matter Loss in Early Schizophrenia. *Arch. Gen. Psychiatry.* 67, 674 (2010).
- 536 49. A.-K. J. Fett, W. Viechtbauer, M.-G. Dominguez, D. L. Penn, J. van Os, L. Krabbendam,  
537 The relationship between neurocognition and social cognition with functional outcomes in  
538 schizophrenia: A meta-analysis. *Neurosci. Biobehav. Rev.* 35, 573–588 (2011).
- 539 50. T. Onitsuka, P. G. Nestor, R. J. Gurrera, M. E. Shenton, K. Kasai, M. Frumin, M. A.  
540 Niznikiewicz, R. W. McCarley, Association between reduced extraversion and right  
541 posterior fusiform gyrus gray matter reduction in chronic schizophrenia. *Am. J.*  
542 *Psychiatry.* 162, 599–601 (2005).



- 543 51. C. Ridgewell, J. U. Blackford, M. McHugo, S. Heckers, Personality traits predicting  
544 quality of life and overall functioning in schizophrenia. *Schizophr. Res.* 182, 19–23  
545 (2017).
- 546 52. I. Kiss, Á. Fábíán, G. Benedek, S. Kéri, When doors of perception open: Visual contrast  
547 sensitivity in never-medicated, first-episode schizophrenia. *J. Abnorm. Psychol.* 119, 586–  
548 593 (2010).
- 549 53. S. Kéri, I. Kiss, O. Kelemen, G. Benedek, Z. Janka, Anomalous visual experiences,  
550 negative symptoms, perceptual organization and the magnocellular pathway in  
551 schizophrenia: a shared construct? *Psychol. Med.* 35, 1445–1455 (2005).
- 552 54. S. M. Silverstein, A. R. Seitz, A. O. Ahmed, J. L. Thompson, V. Zemon, M. Gara, P. D.  
553 Butler, C. Boulevard, L. West, H. L. West, W. Plains, Y. P. Hospital, W. Plains, C.  
554 Professions, R. W. Johnson, O. Road, Development and Evaluation of a Visual  
555 Remediation Intervention for People with Schizophrenia. *J. Psychiatry Brain Sci.* 4,  
556 e200017 (2020).
- 557 55. A. F. T. Arnsten, Stress weakens prefrontal networks: molecular insults to higher  
558 cognition. *Nat. Neurosci.* 18, 1376–1385 (2015).
- 559 56. O. D. Howes, R. M. Murray, Schizophrenia: an integrated sociodevelopmental-cognitive  
560 model. *Lancet.* 383, 1677–1687 (2014).
- 561 57. M. Kahl, G. Wagner, F. de la Cruz, S. Köhler, C. C. Schultz, Resilience and cortical  
562 thickness: a MRI study. *Eur. Arch. Psychiatry Clin. Neurosci.* 270, 533–539 (2020).
- 563 58. S. J. A. Van der Werff, J. N. Pannekoek, I. M. Veer, M. J. van Tol, A. Aleman, D. J.  
564 Veltman, F. G. Zitman, S. A. R. B. Rombouts, B. M. Elzinga, N. J. A. van der Wee,  
565 Resilience to childhood maltreatment is associated with increased resting-state functional  
566 connectivity of the salience network with the lingual gyrus. *Child Abus. Negl.* 37, 1021–  
567 1029 (2013).
- 568 59. S. Frangou, Neuroimaging Markers of Risk, Disease Expression, and Resilience to Bipolar  
569 Disorder. *Curr. Psychiatry Rep.* 21, 52 (2019).
- 570 60. W. Singer, Development and Plasticity of Cortical Processing Architectures. *Science* (80-  
571 ). 270, 758–764 (1995).
- 572 61. J. Klosterkötter, M. Hellmich, E. M. Steinmeyer, F. Schultze-Lutter, Diagnosing  
573 Schizophrenia in the Initial Prodromal Phase. *Arch. Gen. Psychiatry.* 58, 158–164 (2001).
- 574 62. H. Sass, H. Wittchen, Diagnostisches und Statistisches Manual Psychischer Störungen  
575 (Hogrefe, Bern, Switzerland, 2003).
- 576 63. R. C. Oldfield, The Assessment and Analysis of Handedness: The Edinburgh Inventory.  
577 *Neuropsychologia.* 9, 97–113 (1971).
- 578 64. S. Lehrl, G. Triebig, B. Fischer, Multiple choice vocabulary test MWT as a valid and short  
579 test to estimate premorbid intelligence. *Acta Neurol. Scand.* 91, 335–345 (1995).
- 580 65. M. Lam, S. Awasthi, H. J. Watson, J. Goldstein, G. Panagiotaropoulou, V. Trubetskoy, R.  
581 Karlsson, O. Frei, C.-C. Fan, W. De Witte, N. R. Mota, N. Mullins, K. Brügger, S. H. Lee,  
582 N. R. Wray, N. Skarabis, H. Huang, B. Neale, M. J. Daly, M. Mattheisen, R. Walters, S.  
583 Ripke, RICOPILI: Rapid Imputation for COnsortias PIpeLIne. *Bioinformatics.* 36, 930–  
584 933 (2019).
- 585 66. J. Euesden, C. M. Lewis, P. F. O'Reilly, PRSice: Polygenic Risk Score software.  
586 *Bioinformatics.* 31, 1466–1468 (2015).

587 67. S. Ripke, B. M. Neale, A. Corvin, J. T. R. Walters, K. H. Farh, P. A. Holmans, P. Lee, B.  
588 Bulik-Sullivan, D. A. Collier, H. Huang, T. H. Pers, I. Agartz, E. Agerbo, M. Albus, M.  
589 Alexander, F. Amin, S. A. Bacanu, M. Begemann, R. A. Belliveau, J. Bene, S. E. Bergen,  
590 E. Bevilacqua, T. B. Bigdeli, D. W. Black, R. Bruggeman, N. G. Buccola, R. L. Buckner,  
591 W. Byerley, W. Cahn, G. Cai, D. Champion, R. M. Cantor, V. J. Carr, N. Carrera, S. V.  
592 Catts, K. D. Chambert, R. C. K. Chan, R. Y. L. Chen, E. Y. H. Chen, W. Cheng, E. F. C.  
593 Cheung, S. A. Chong, C. R. Cloninger, D. Cohen, N. Cohen, P. Cormican, N. Craddock, J.  
594 J. Crowley, D. Curtis, M. Davidson, K. L. Davis, F. Degenhardt, J. Del Favero, D.  
595 Demontis, D. Dikeos, T. Dinan, S. Djurovic, G. Donohoe, E. Drapeau, J. Duan, F.  
596 Dudbridge, N. Durmishi, P. Eichhammer, J. Eriksson, V. Escott-Price, L. Essioux, A. H.  
597 Fanous, M. S. Farrell, J. Frank, L. Franke, R. Freedman, N. B. Freimer, M. Friedl, J. I.  
598 Friedman, M. Fromer, G. Genovese, L. Georgieva, I. Giegling, P. Giusti-Rodríguez, S.  
599 Godard, J. I. Goldstein, V. Golimbet, S. Gopal, J. Gratten, L. De Haan, C. Hammer, M. L.  
600 Hamshere, M. Hansen, T. Hansen, V. Haroutunian, A. M. Hartmann, F. A. Henskens, S.  
601 Herms, J. N. Hirschhorn, P. Hoffmann, A. Hofman, M. V. Hollegaard, D. M. Hougaard,  
602 M. Ikeda, I. Joa, A. Julià, R. S. Kahn, L. Kalaydjieva, S. Karachanak-Yankova, J.  
603 Karjalainen, D. Kavanagh, M. C. Keller, J. L. Kennedy, A. Khrunin, Y. Kim, J. Klovins, J.  
604 A. Knowles, B. Konte, V. Kucinskis, Z. A. Kucinskiene, H. Kuzelova-Ptackova, A. K.  
605 Kähler, C. Laurent, J. L. C. Keong, S. H. Lee, S. E. Legge, B. Lerer, M. Li, T. Li, K. Y.  
606 Liang, J. Lieberman, S. Limborska, C. M. Loughland, J. Lubinski, J. Lönnqvist, M.  
607 Macek, P. K. E. Magnusson, B. S. Maher, W. Maier, J. Mallet, S. Marsal, M. Mattheisen,  
608 M. Mattingsdal, R. W. McCarley, C. McDonald, A. M. McIntosh, S. Meier, C. J. Meijer,  
609 B. Melegh, I. Melle, R. I. Meshulam-Gately, A. Metspalu, P. T. Michie, L. Milani, V.  
610 Milanova, Y. Mokrab, D. W. Morris, O. Mors, K. C. Murphy, R. M. Murray, I. Myin-  
611 Germeys, B. Müller-Myhsok, M. Nelis, I. Nenadic, D. A. Nertney, G. Nestadt, K. K.  
612 Nicodemus, L. Nikitina-Zake, L. Nisenbaum, A. Nordin, E. O'Callaghan, C. O'Dushlaine,  
613 F. A. O'Neill, S. Y. Oh, A. Olincy, L. Olsen, J. Van Os, C. Pantelis, G. N. Papadimitriou,  
614 S. Papiol, E. Parkhomenko, M. T. Pato, T. Paunio, M. Pejovic-Milovancevic, D. O.  
615 Perkins, O. Pietiläinen, J. Pimm, A. J. Pocklington, J. Powell, A. Price, A. E. Pulver, S. M.  
616 Purcell, D. Quested, H. B. Rasmussen, A. Reichenberg, M. A. Reimers, A. L. Richards, J.  
617 L. Roffman, P. Roussos, D. M. Ruderfer, V. Salomaa, A. R. Sanders, U. Schall, C. R.  
618 Schubert, T. G. Schulze, S. G. Schwab, E. M. Scolnick, R. J. Scott, L. J. Seidman, J. Shi,  
619 E. Sigurdsson, T. Silagadze, J. M. Silverman, K. Sim, P. Slominsky, J. W. Smoller, H. C.  
620 So, C. C. A. Spencer, E. A. Stahl, H. Stefansson, S. Steinberg, E. Stogmann, R. E. Straub,  
621 E. Strengman, J. Strohmaier, T. S. Stroup, M. Subramaniam, J. Suvisaari, D. M. Svrakic,  
622 J. P. Szatkiewicz, E. Söderman, S. Thirumalai, D. Toncheva, S. Tosato, J. Veijola, J.  
623 Waddington, D. Walsh, D. Wang, Q. Wang, B. T. Webb, M. Weiser, D. B. Wildenauer, N.  
624 M. Williams, S. Williams, S. H. Witt, A. R. Wolen, E. H. M. Wong, B. K. Wormley, H. S.  
625 Xi, C. C. Zai, X. Zheng, F. Zimprich, N. R. Wray, K. Stefansson, P. M. Visscher, R.  
626 Adolfsson, O. A. Andreassen, D. H. R. Blackwood, E. Bramon, J. D. Buxbaum, A. D.  
627 Børghlum, S. Cichon, A. Darvasi, E. Domenici, H. Ehrenreich, T. Esko, P. V. Gejman, M.  
628 Gill, H. Gurling, C. M. Hultman, N. Iwata, A. V. Jablensky, E. G. Jönsson, K. S. Kendler,  
629 G. Kirov, J. Knight, T. Lencz, D. F. Levinson, Q. S. Li, J. Liu, A. K. Malhotra, S. A.  
630 McCarroll, A. McQuillin, J. L. Moran, P. B. Mortensen, B. J. Mowry, M. M. Nöthen, R.  
631 A. Ophoff, M. J. Owen, A. Palotie, C. N. Pato, T. L. Petryshen, D. Posthuma, M.  
632 Rietschel, B. P. Riley, D. Rujescu, P. C. Sham, P. Sklar, D. St Clair, D. R. Weinberger, J.  
633 R. Wendland, T. Werge, M. J. Daly, P. F. Sullivan, M. C. O'Donovan, Biological insights  
634 from 108 schizophrenia-associated genetic loci. *Nature*. 511, 421–427 (2014).

- 635 68. R. Deichmann, C. Schwarzbauer, R. Turner, Optimisation of the 3D MDEFT sequence for  
636 anatomical brain imaging: technical implications at 1.5 and 3 T. *Neuroimage*. 21, 757–767  
637 (2004).
- 638 69. B. Fischl, A. M. Dale, Measuring the thickness of the human cerebral cortex from  
639 magnetic resonance images. *PNAS*. 97, 11050–11055 (2000).
- 640 70. D. J. Hagler, A. P. Saygin, M. I. Sereno, Smoothing and cluster thresholding for cortical  
641 surface-based group analysis of fMRI data. *Neuroimage*. 33, 1093–1103 (2006).
- 642 71. D. N. Greve, B. Fischl, False positive rates in surface-based anatomical analysis.  
643 *Neuroimage*. 171, 6–14 (2018).
- 644 72. K. L. Miller, F. Alfaro-Almagro, N. K. Bangerter, D. L. Thomas, E. Yacoub, J. Xu, A. J.  
645 Bartsch, S. Jbabdi, S. N. Sotiropoulos, J. L. R. Andersson, L. Griffanti, G. Douaud, T. W.  
646 Okell, P. Weale, I. Dragonu, S. Garratt, S. Hudson, R. Collins, M. Jenkinson, P. M.  
647 Matthews, S. M. Smith, Multimodal population brain imaging in the UK Biobank  
648 prospective epidemiological study. *Nat. Neurosci*. 19, 1523–1536 (2016).
- 649 73. Johnson T, Package ‘gtx’ (2013).
- 650 74. J. T. International Consortium for Blood Pressure Genome-Wide Association Studies,  
651 Ehret GB, Munroe PB, Rice KM, Bochud M, Johnson AD, Chasman DI, Smith AV, Tobin  
652 MD, Verwoert GC, Hwang SJ, Pihur V, Vollenweider P, O’Reilly PF, Amin N, Bragg-  
653 Gresham JL, Teumer, Genetic variants in novel pathways influence blood pressure and  
654 cardiovascular disease risk. *Nature*. 478, 103–109 (2011).
- 655 75. S. Smith, G. Douaud, W. Chen, T. Hanayik, F. Alfaro-Almagro, K. Sharp, L. T. Elliott,  
656 Enhanced Brain Imaging Genetics in UK Biobank. *bioRxiv* (2020).
- 657  
658

## 659 Acknowledgments

660  
661 **General:** The authors are grateful to Christina Novak and Astrid Rehner for help with  
662 recruiting and data acquisition. We also thank Caroline Mann for advice regarding data  
663 processing.  
664

### 665 **Funding:**

666 German Federal Ministry of Education and Research (BMBF) and the Max Planck Society  
667 (MDH)  
668 Research Grant for Doctoral Programmes in Germany from The German Academic  
669 Exchange Service (DAAD) (ER)  
670 German Research Foundation (DFG) grant CRC 1193 Z03 (AR)  
671 MRC Centre for Neuropsychiatric Genetics and Genomics (MR/L010305/1) (AR)  
672

### 673 **Author contributions:**

674 Conceptualization: MDH, RAB  
675 Methodology: MDH, ER, NRM, RAB  
676 Investigation: PKH, MDH, RAB  
677 Visualization: MDH  
678 Supervision: RAB  
679 Writing – original draft: MDH, RAB  
680 Writing – review and editing: MDH, RAB, WS, DEJL, TL, AR  
681

682 **Competing interests:** The authors declare that they have no competing interests.  
683

684 **Data and materials availability:** All data needed to evaluate the conclusions in the paper  
685 are present in the paper and/or the Supplementary Materials. The data can be provided by  
686 Robert A. Bittner pending scientific review and a completed material transfer agreement.  
687 Requests for the data should be submitted to: Robert A. Bittner.

688 **Figures**

689

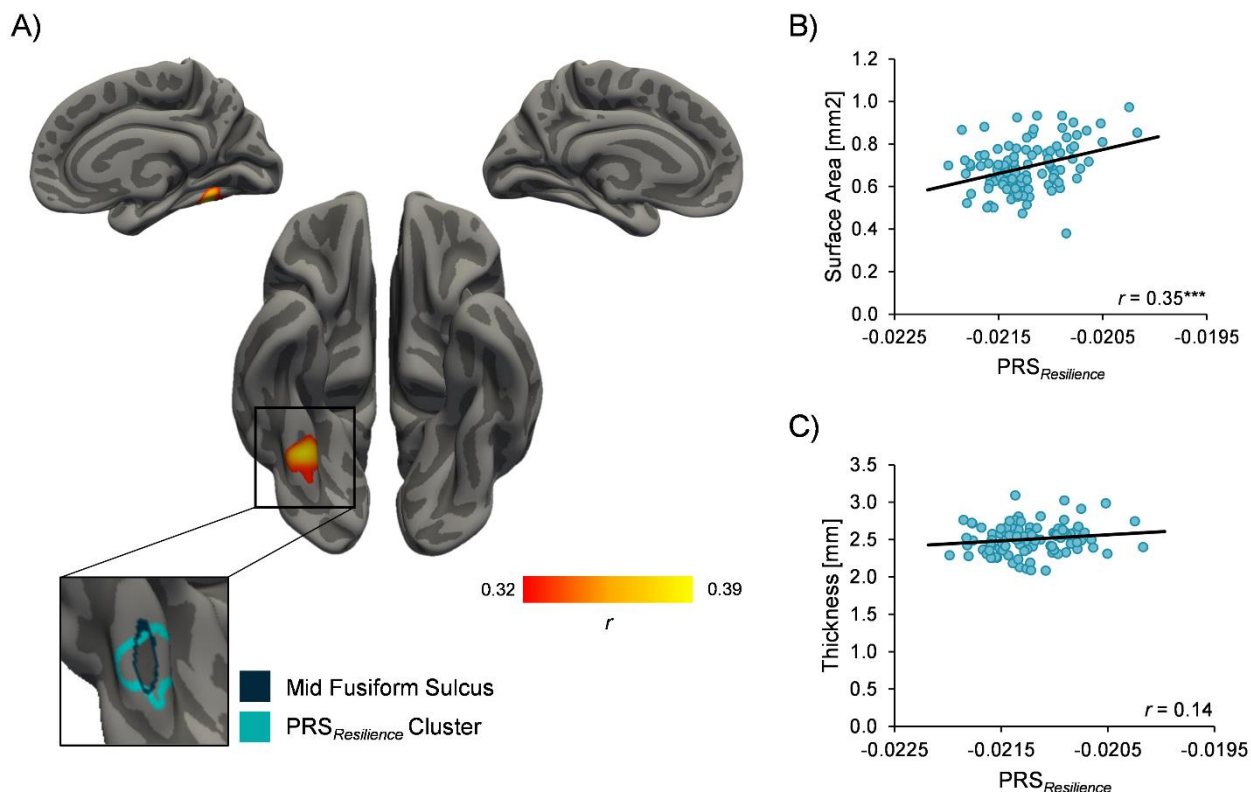

690

691 **Figure 1. Statistical map showing a significant whole-brain correlation between**  
692 **schizophrenia polygenic resilience scores (PRS<sub>Resilience</sub>) and cortical volume in the**  
693 **right fusiform gyrus** (cluster-forming threshold:  $p < .001$ , corrected cluster-wise  $p < .05$ ).  
694 Results include corrections for effects of age and intracranial volume and are shown from  
695 medial, ventral and lateral perspectives (A). Average vertex-wise surface area (B) and  
696 cortical thickness (C) values were extracted from the depicted cluster and plotted against  
697 PRS<sub>Resilience</sub>.



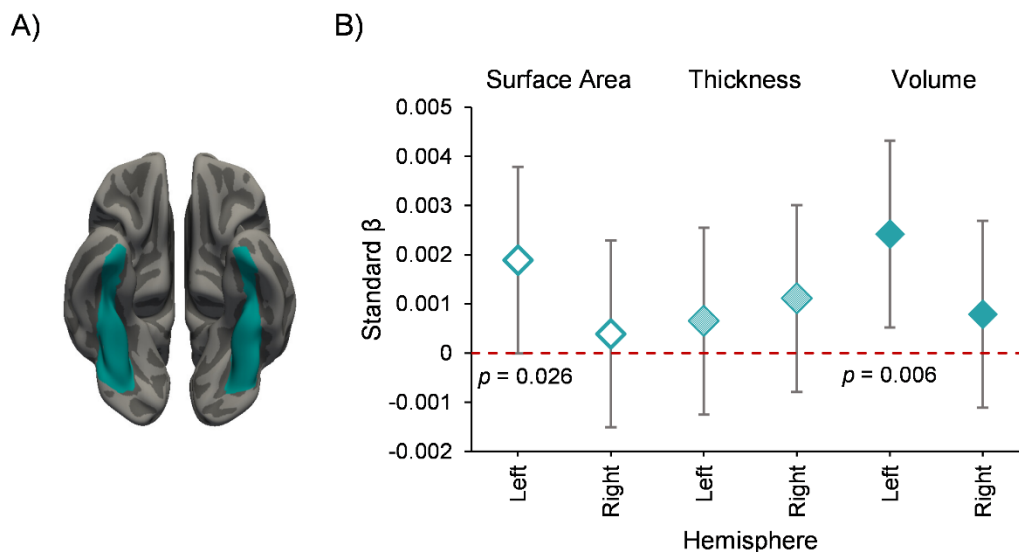

698

699 **Figure 2. Effects of schizophrenia polygenic resilience scores ( $PRS_{Resilience}$ ) on fusiform gyrus**  
700 **(FFG) anatomical metrics in the UK Biobank sample. A) Shows Desikan-Killiany (33)**  
701 **FFG parcels, B) depicts  $PRS_{Resilience}$  effects for anatomical metrics, which were significant**  
702 **for cortical volume and surface area in the left FFG. Error bars indicate 95% confidence**  
703 **intervals.**
