## **Evidence from imaging resilience genetics for a protective mechanism against schizophrenia in the ventral visual pathway**

Running Title: Schizophrenia resilience genetics and FFG volume

Meike D. Hettwer<sup>1,2,3,4</sup> Thomas M. Lancaster<sup>5,6</sup>, Eva Raspor<sup>1</sup>, Peter K. Hahn<sup>1</sup>, Nina Roth Mota<sup>7,8</sup>, Wolf Singer<sup>9,10,11</sup>, Andreas Reif<sup>1</sup>, David E.J. Linden<sup>6,12</sup>, Robert A. Bittner<sup>1,9\*</sup>

<sup>1</sup> Department of Psychiatry, Psychosomatic Medicine, and Psychotherapy, University Hospital Frankfurt, Goethe University, Frankfurt am Main, Germany

<sup>2</sup> Max Planck School of Cognition, Max Planck Institute for Human Cognitive and Brain Sciences, Leipzig, Germany

<sup>3</sup> Institute of Neuroscience and Medicine, Brain & Behaviour (INM-7), Research Centre Jülich, Jülich, Germany

<sup>4</sup> Institute of Systems Neuroscience, Medical Faculty, Heinrich Heine University Düsseldorf, Düsseldorf, Germany

<sup>5</sup> School of Psychology, Bath University, Bath, UK

<sup>6</sup> MRC Centre for Neuropsychiatric Genetics and Genomics, Division of Psychological Medicine and Clinical Neuroscience, School of Medicine, Cardiff University, Cardiff, UK

<sup>7</sup> Department of Human Genetics, Radboud University Medical Center, Donders Institute for Brain, Cognition and Behaviour, Nijmegen, The Netherlands

<sup>8</sup> Department of Psychiatry, Radboud University Medical Center, Donders Institute for Brain, Cognition and Behaviour, Nijmegen, The Netherlands

NOTE: This preprint reports new research that has not been certified by peer review and should not be used to guide clinical practice.

<sup>9</sup> Ernst Strüngmann Institute for Neuroscience (ESI) in Cooperation with Max Planck Society, Frankfurt am Main, Germany

<sup>10</sup> Max Planck Institute for Brain Research (MPI BR), Frankfurt am Main, Germany

<sup>11</sup> Frankfurt Institute for Advanced Studies (FIAS), Frankfurt am Main, Germany

<sup>12</sup> School for Mental Health and Neuroscience, Faculty of Health, Medicine and Life Sciences, Maastricht University, Maastricht, The Netherlands

\*Corresponding author. Department of Psychiatry, Psychosomatic Medicine and Psychotherapy, University Hospital Frankfurt, Goethe University, Heinrich-Hoffmann-Str. 10, D-60528 Frankfurt am Main, Germany.

Phone: +49 69 6301 84713. Fax: +49 69 6301 81775.

Email: [robert.bittner@med.uni-frankfurt.de](mailto:robert.bittner@med.uni-frankfurt.de)

Total number of words in abstract: 247/250

Total number of words in text: 3994/4000

## **ORCID IDS**

M.D.H.: [orcid.org/0000-0002-7973-6752](https://orcid.org/0000-0002-7973-6752)

T.M.L.: [orcid.org/0000-0003-1322-2449](https://orcid.org/0000-0003-1322-2449)

E.R.: [orcid.org/0000-0003-4418-7084](https://orcid.org/0000-0003-4418-7084)

N.R.M.: [orcid.org/0000-0003-3504-759X](https://orcid.org/0000-0003-3504-759X)

W.S.: [orcid.org/0000-0002-8299-2319](https://orcid.org/0000-0002-8299-2319)

A.R.: [orcid.org/0000-0002-0992-634X](https://orcid.org/0000-0002-0992-634X)

D.E.J.L.: [orcid.org/0000-0002-5638-9292](https://orcid.org/0000-0002-5638-9292)

R.A.B.: [orcid.org/0000-0003-2021-0358](https://orcid.org/0000-0003-2021-0358)

## **ABSTRACT**

### *Introduction:*

Illuminating neurobiological mechanisms underlying the protective effect of recently discovered common genetic resilience variants for schizophrenia is crucial for more effective prevention efforts. Current models implicate adaptive neuroplastic changes in the visual system and their pro-cognitive effects as a schizophrenia resilience mechanism. We investigated whether common genetic resilience variants might affect brain structure in similar neural circuits.

### *Method:*

Using structural magnetic resonance imaging, we measured the impact of an established schizophrenia polygenic resilience score ( $PRS_{Resilience}$ ) on cortical volume, thickness, and surface area in 101 healthy subjects and in a replication sample of 33,224 healthy subjects (UK Biobank).

### *Finding:*

We observed a significant positive whole-brain correlation between  $PRS_{Resilience}$  and cortical volume in the right fusiform gyrus (FFG) ( $r=0.35$ ;  $p=.0004$ ). Post-hoc analyses in this cluster revealed an impact of  $PRS_{Resilience}$  on cortical surface area. The replication sample showed a positive correlation between  $PRS_{Resilience}$  and global cortical volume and surface area in the left FFG.

### *Conclusion:*

Our findings represent the first evidence of a neurobiological correlate of a genetic resilience factor for schizophrenia. They support the view that schizophrenia resilience emerges from strengthening neural circuits in the ventral visual pathway and an increased capacity for the disambiguation of social and non-social visual information. This may aid psychosocial functioning, ameliorate the detrimental effects of subtle perceptual and cognitive disturbances in at-risk individuals, and facilitate coping with

the cognitive and psychosocial consequences of stressors. Our results thus provide a novel link between visual cognition, the vulnerability-stress concept and schizophrenia resilience models.

## **KEYWORDS**

Imaging genetics; structural MRI; visual system; fusiform gyrus; resilience factor

## INTRODUCTION

The effective prevention of schizophrenia depends on a clear understanding of both risk mechanisms and mechanisms of resilience, which confer protection from this debilitating disorder. The emerging field of resilience research promises to provide novel pathways toward improved treatment and prevention strategies for psychiatric disorders.<sup>1–4</sup>

Resilience describes the phenomenon that many people with considerable exposure to risk factors for mental disorders retain good mental health.<sup>5–7</sup> Importantly, current concepts regard resilience as a dynamic process facilitating adjustments to potentially disabling stressors, rather than as a trait or stable personality profile.<sup>3,6–8</sup> Nevertheless, there is clear evidence that resilience factors which contribute to resilience capacity<sup>5,6</sup> may well be genetically determined.<sup>5,9–15</sup>

Resilience research in schizophrenia needs to acknowledge its complex, decade-spanning pathophysiological trajectory prominently involving neurodevelopmental disturbances<sup>16–18</sup> and psychosocial stressors.<sup>19,20</sup> Moreover, schizophrenia is a disorder of information processing<sup>21,22</sup> featuring wide-ranging and pervasive perceptual and cognitive impairments.<sup>23</sup> Schizophrenia resilience mechanisms might thus act over prolonged periods at multiple premorbid stages and should likely affect cognition. The high heritability of schizophrenia<sup>24</sup> puts a particular emphasis on genetic mediators of resilience.

Concerted efforts have discovered common and rare genetic risk variants for schizophrenia.<sup>25–27</sup> The additive effects of common variants have been captured by polygenic risk scores.<sup>28</sup> Recently, first successful attempts at elucidating the genetic architecture of resilience<sup>29</sup> have discovered single nucleotide polymorphisms (SNPs) moderating the penetrance of established common genetic risk factors.<sup>30</sup> Resilience variants were identified by contrasting unaffected and affected individuals at an equally

elevated polygenic risk<sup>25</sup> to reveal residual genetic variation associated with resilience in high-risk but unaffected individuals. Schizophrenia risk variants were excluded to perform a genome-wide association study (GWAS) of resilience that detects effects on caseness, which are conditionally independent from risk variants. Thus, the identified resilience variants are not simply protective variants, i.e. the alternate alleles at risk loci. Rather, they are independent from and orthogonal to risk variants, addressing the concern that resilience must not simply be defined as the flip side of vulnerability.<sup>5,6</sup> Mirroring the concept of polygenic risk scores, the additive effects of these variants have been captured in the first polygenic resilience score ( $PRS_{Resilience}$ ) for schizophrenia,<sup>29</sup> which reflects an individual's genetic resistance to illness manifestation. This novel approach opens valuable opportunities to investigate how heritable mediators of resilience to schizophrenia influence neural systems to exert their protective effect.

Evidence for non-genetic schizophrenia resilience factors that could inform this research remains scarce. Presently, three putative protective mechanisms are most prominently discussed.<sup>31,32</sup> First, several pre- and perinatal factors appear to be protective against schizophrenia by increasing resilience to pregnancy-related and obstetric complications.<sup>32</sup> Second, specific non-neurological auto-immune disorders, rheumatoid arthritis and ankylosing spondylitis, appear to be associated with a lower illness risk.<sup>33</sup> Third, several resilience models emphasize the importance of the visual system.<sup>31,34,35</sup> The latter are partly based on studies suggesting a reduced risk for schizophrenia in people with congenital/early (C/E) blindness,<sup>33,35–38</sup> which is neither observed in other forms of sensory loss, including C/E deafblindness and blindness acquired later in life,<sup>35,39–41</sup> nor for other mental disorders.<sup>42–46</sup> Rather than to blindness per se, this has been attributed to adaptive reorganization of the visual system triggered by C/E blindness<sup>47,48</sup> and concurrent improvements in cognitive functions

impaired in schizophrenia.<sup>35,40</sup> C/E blind individuals, but not late blind individuals show increased gray matter in parts of the inferior occipital, fusiform and lingual gyrus<sup>49,50</sup> as well as functional reorganization of both the ventral and dorsal visual pathway.<sup>51,52</sup>

A useful framework for the interpretation of the postulated protective effect of C/E blindness is offered by the predictive coding theory of brain function.<sup>53,54</sup> Converging evidence indicates that key clinical and cognitive symptoms of schizophrenia arise from a decreased precision and stability of internal high-level priors relative to sensory information.<sup>31,55</sup> It has been argued that adaptive reorganization occurring in C/E blindness – and with it considerably greater reliance on context extracted from other sensory modalities – should improve the precision and stability of high-level and supramodal priors.<sup>31</sup> The resulting greater primacy of priors relative to sensory data may facilitate resilience to schizophrenia.<sup>31</sup>

Importantly, current epidemiological evidence remains inconclusive due to the low base rates of both disorders.<sup>56,57</sup> Yet, while there is presently no consensus regarding the proposed role of C/E blindness as a resilience factor for schizophrenia,<sup>31,34,35,38,40</sup> these models provide predictions that are testable using neuroimaging. Specifically, current concepts raise the question, whether similar but more subtle changes of the visual system exerting a weaker protective effect could also occur as a form of genetically mediated natural variation in sighted individuals.

A plethora of schizophrenia risk factors have been identified.<sup>16,32</sup> Similarly, multiple neurobiological pathways promoting resilience to the disorder would have to be expected. An involvement of the visual system in one of these resilience mechanisms would be conceivable given the prominent visual perceptual impairments featured in schizophrenia. These encompass basic deficits in visual acuity and contrast sensitivity<sup>58–60</sup> and subsequent disturbances of perceptual organization including figure-ground segregation, coherent motion detection, contour integration, and

perceptual closure.<sup>61–66</sup> They further perturb higher-level visual processes, particularly object recognition,<sup>61,65,67</sup> higher-order cognitive domains including working memory as well as social cognition,<sup>62,67–72</sup> and contribute to poor functional outcome.<sup>73–75</sup> Abnormalities in both the dorsal and ventral visual pathway have been implicated.<sup>61,65,76,77</sup> Notably, visual dysfunction is among the strongest predictors of transition to full-blown illness in high-risk individuals<sup>78,79</sup> – more predictive than any other sensory anomalies and uniquely so for schizophrenia among mental disorders.<sup>79</sup> Searching for resilience-promoting mechanisms within the visual system partly builds upon a successful strategy for risk research in neuropsychiatric disorders. Genetic studies indicate that rare but highly penetrant risk factors provide information about the neurobiological consequences of common genetic risk factors, which despite their lower penetrance tend to affect the same pathophysiological pathways.<sup>80,81</sup> C/E blindness as one potential, rare resilience factor with a profound impact on the brain could thus point to similar but less penetrant mechanisms of common resilience factors. Accordingly, SNPs conferring resilience to schizophrenia might exert their protective influence partly by affecting neuroplasticity in the visual system. To test this hypothesis and to investigate brain morphological correlates of genetic resilience to schizophrenia, we conducted an imaging genetics study using structural magnetic resonance imaging (sMRI) in healthy participants.



## **METHODS AND MATERIALS**

### *Participants*

All participants gave their written informed consent to participate in the study in accordance with the study protocol approved by the ethical review board of the Faculty of Medicine at Goethe University. The experimental procedures were conducted in conformity with the approved guidelines and the Declaration of Helsinki. We obtained structural MRI and genetic data from 105 right-handed subjects with normal or corrected to normal vision and no family or personal history of psychiatric disorders, according to the German Version of the SCID-I questionnaire for DSM-IV.<sup>82</sup> Handedness was measured with the Edinburgh Handedness Inventory<sup>83</sup> and IQ was determined using the MWT-B.<sup>84</sup> We excluded four subjects due to excessive head motion during scanning (n=1) or substantial reconstruction errors during MRI processing (n=3), resulting in 101 subjects for the analysis (55 female; Mean age: 26.3 ± 4.71 years).

### *Genotyping*

We collected venous blood samples for DNA extraction. Genotyping was performed using custom Illumina HumanCoreExome-24 BeadChip genotyping arrays, which contain 570,038 genetic variants (Illumina, Inc., San Diego, CA). The Rapid Imputation and Computational Pipeline (RICOPILI<sup>85</sup>) was used for quality control, principal component analysis and imputation. Individuals were excluded for ambiguous sex, cryptic relatedness up to third degree relatives by identity of descent, genotyping completeness < 99 %, and non-European ethnicity admixture. SNPs were excluded where the minor allele frequency was < 1 %, if the call rate was < 99 % or if the  $\chi^2$ -test for Hardy-Weinberg Equilibrium had a p-value < 1 e-06. Before imputation, we assessed genetic homogeneity in each sample using multi-dimensional scaling (MDS)

analysis. We excluded ancestry outliers through visual inspection of the first two components.

### *Calculation of polygenic resilience scores*

We calculated schizophrenia PRS<sub>Resilience</sub> based on resilience loci identified by Hess et al.,<sup>29</sup> who included 3786 high-risk resilient individuals and 18,619 patients at equal polygenic risk in their initial discovery sample. Calculations of polygenic scores were performed according to previously described protocols with PRSice software v. 2.2.8.<sup>86,87</sup> Following the established PGC protocol,<sup>25</sup> polygenic scores were clumped using linkage disequilibrium (LD) and distance thresholds of  $r^2 = 0.1$ , within a 500 kb window. The major histocompatibility complex (MHC) region was excluded due to high LD.<sup>25</sup> We calculated PRS<sub>Resilience</sub> based on SNPs thresholded at  $p < 0.05$  because, among nominally significant PRS<sub>Resilience</sub> reported, SNPs included at this threshold were shown to explain the most variance.<sup>29</sup>

### *Acquisition and analysis of MRI data*

We acquired structural MRI data on a 3T Trio MR-scanner (Siemens, Erlangen, Germany) using a high-resolution T1-weighted Modified Driven Equilibrium Fourier Transform (MDEFT) sequence<sup>88</sup> (voxel size: 1 x 1 x 1 mm<sup>3</sup>; TR = 7.92; TE = 2.4; TI = 910 ms; FOV = 256 x 256 mm<sup>2</sup>; number of slices per volume = 176; flip angle = 15°, slice thickness = 1 mm). We used FreeSurfer (version 6.0.1; <http://surfer.nmr.mgh.harvard.edu>) for semi-automated preprocessing and surface reconstruction, using bias-corrected<sup>89,90</sup> T1-weighted anatomical scans as the input (see Supplementary Materials). Measures of cortical thickness, cortical volume, and surface area were computed using FreeSurfer.<sup>91,92</sup> Surface maps were smoothed using a surface-based 10-mm full-width-half-maximum smoothing kernel.

### *Statistical group analysis*

Three general linear models (GLMs) were applied at each vertex to estimate the relationship between  $PRS_{Resilience}$  and cortical volume, thickness, and surface area. Total intracranial volume (ICV) and age were included as covariates in partial correlation analyses.  $PRS_{Resilience}$ , age and ICV were demeaned to allow for better model fit. To correct for multiple comparisons, we used surface-based cluster-size exclusion as implemented in FreeSurfer.<sup>93</sup> We applied an initial cluster-forming threshold (CFT) of  $p < .001$  and performed Monte Carlo simulations (10,000 iterations; cluster-wise  $p < .05$ , adjusted for testing both hemispheres separately, i.e.  $p < .025$ ). These statistical parameters have been recommended to protect from type 1 errors.<sup>94</sup>

### *UK Biobank (UKBB) replication analysis*

To test the replicability of our findings, we performed additional analyses on GWAS summary statistics (<https://open.win.ox.ac.uk/ukbiobank/big40/pheweb33k/phenotypes/>) from a UKBB general population sample ( $n = 33,224$ ).<sup>95</sup> For this sample, vertex-wise data is not publicly available, precluding a whole-brain analysis. Rather, region of interest (ROI) based data is available in the standardized form of 33 Desikan-Killiany (DK) parcels per hemisphere (66 total), representing almost the entirety of the cerebral cortex.<sup>96</sup> We used the well-established ‘gtx’ method<sup>97–100</sup> (see Supplementary Methods) to test the association between  $PRS_{Resilience}$  and cortical volume, thickness, and surface area in a ROI based manner. In keeping with the strictly confirmatory nature of this analysis, we focused on ROIs that best represent the location of clusters observed in the vertex-wise analysis in the discovery sample. Additionally, we compared effect sizes of these

ROIs to the distribution of effect sizes of all ROIs, averaged across hemispheres, via z-tests.

## RESULTS

### *Discovery sample*

In our discovery sample, we observed a positive whole-brain correlation between  $PRS_{Resilience}$  and cortical volume in the right fusiform gyrus (FFG) after correction for multiple comparisons (MNI: X = 33.7; Y = -51.4, Z = -16.4; cluster size: 338.1 mm<sup>2</sup>;  $r = 0.35$ ; cluster-wise  $p = .0004$ ; Figure 1A). Comparison with the neuroanatomical literature<sup>101</sup> and probabilistic neuroimaging atlases of the ventral temporal cortex (VTC)<sup>102–104</sup> indicated a position of this cluster on top of the mid-fusiform sulcus (MFS; see Supplementary Figure S1) and a partial overlap with the fusiform face area (FFA).<sup>102–104</sup> Extracting the corresponding values from the FFG cluster revealed that  $PRS_{Resilience}$  was significantly correlated with FFG surface area ( $r = .35$ ,  $p < .001$ ; Figure 1B) but not with cortical thickness ( $r = .14$ ,  $p = .17$ ; Figure 1C). We further observed an impact of  $PRS_{Resilience}$  on left FFG volume at the initial CFT ( $p < .001$ ), which, however, did not survive multiple comparisons correction (cluster-wise  $p > .05$ ; Supplementary Figure S2). There was no significant correlation between  $PRS_{Resilience}$  and either surface area or cortical thickness at the whole-brain level.

### *UKBB replication sample*

Because the findings in our discovery sample hinted at a bilateral effect in the FFG, our replication analysis focused on left and right FFG parcels<sup>96</sup> (Figure 2A). In the UKBB sample, we observed a significant effect of  $PRS_{Resilience}$  on cortical volume ( $p = .006$ ) and surface area ( $p = .026$ ) in the left FFG but not in the right FFG ( $p_{volume} = .208$ ;  $p_{surface\ area} = .343$ ; Figure 2B).  $PRS_{Resilience}$  did not impact cortical thickness. Averaged across hemispheres, FFG effects of  $PRS_{Resilience}$  on surface area ( $z = 2.5$ ,  $p = .012$ ) and cortical volume ( $z = 2.09$ ,  $p = .036$ ) were significantly higher than for all other ROIs (Figure 2C).

## DISCUSSION

We investigated the neuroanatomical correlates of common genetic variants associated with resilience to schizophrenia using sMRI. In the discovery sample, we observed a positive correlation between  $PRS_{Resilience}$  and cortical volume in the right FFG, a key component of the ventral visual pathway. In the replication sample, we observed a correlation between global left FFG volume and  $PRS_{Resilience}$ , which mirrors the cluster in the left FFG in the discovery sample that did not survive multiple comparisons correction. Involvement of the ventral visual pathway therefore appears not to be specific to one hemisphere. This is in line with evidence that both hemispheres – while independently analyzing half of the visual scene<sup>105–107</sup> – combine their resources to jointly process objects at the fovea.<sup>107</sup> Resilience to schizophrenia thus appears to result from a general increase in ventral visual pathway processing resources. Our findings provide the first direct evidence for a schizophrenia resilience mechanism involving the visual system in line with existing resilience models.

The particularly prominent effect in the FFG in comparison with all other bilateral ROIs indicates that, among cortical areas, the FFG plays a central role in promoting resilience to schizophrenia. Understanding the mechanisms underlying this protective effect requires a detailed assessment of the role of the FFG within the ventral visual pathway.

The ventral visual pathway is primarily involved in object recognition and categorization.<sup>108–110</sup> Along this pathway, the FFG is an important relay between low level visual areas in the occipital lobe and areas in the infero-temporal cortex and parahippocampal gyrus,<sup>108,109</sup> which are considered the top levels in the visual processing hierarchy. Importantly, all areas of the ventral stream from the primary visual cortex all the way up to the infero-temporal cortex are reciprocally connected via feed-forward and feed-back connections, communicating in parallel within various functional

networks.<sup>111,112</sup> This connectivity profile, which also prominently includes interactions with occipital and parietal areas within the dorsal stream as well as prefrontal areas, is pivotal for shaping object and face recognition.<sup>113–115</sup>

The cluster observed in our discovery sample mapped directly onto the right MFS. This sulcus divides the FFG into a lateral and medial part, the two moieties differing in cyto- and receptor-architectonics<sup>116,117</sup> as well as their connectivity profiles within the VTC.<sup>101,118,119</sup> The MFS further forms the central axis of multiple lateral-to-medial functional gradients across the VTC. These gradients relate to the eccentricity of the represented visual field, the size of objects, their animacy and domain specificity.<sup>110,120</sup>

Described characteristics are indicative for the coexistence of functional networks devoted to the preferential processing of object categories.<sup>110</sup> The increased volume of both moieties of the FFG as observed in our data might thus be indicative of a global enhancement of functions facilitating the parallel processing of complementary aspects of visual information.<sup>107</sup> In the context of predictive coding,<sup>53,54</sup> this could imply greater resources for the disambiguation of sensory evidence by capitalizing on the priors stored in the functional architecture of the different processing streams. Notably, patients with schizophrenia are impaired in their ability to use stored knowledge for the interpretation of sensory evidence.<sup>55,121,122</sup> Consequently, the embedding of sensory evidence in the context of a priori knowledge is disturbed. A larger FFG could compensate for disturbances that impede prior based evaluation of sensory information. This might also include an enhanced ability of the ventral stream to integrate input from the dorsal stream and from prefrontal areas, facilitating various facets of perceptual organisation during multiple stages of object processing, which is crucially impaired in schizophrenia.<sup>65</sup> Such an interpretation is well in line with the notion that greater reliability of high-level priors might be protective against schizophrenia.<sup>31</sup>

Increased FFG volume may further contribute to resilience capacities through its involvement in interpersonal communication and social cognition.<sup>120,123–125</sup> Our cluster showed considerable overlap with the right FFA, the two subdivisions of which are located approximately at anterior and posterior ends of the MFS.<sup>101,110,126</sup> The FFA is essential for the processing of face-related information including the decoding of facial components for affect discrimination<sup>120,123,124</sup> and an important perceptual node of social cognitive networks.<sup>125</sup> In schizophrenia, reduced FFG volume acts as a structural neural substrate of various perceptual and affective processing deficits associated with impaired social cognition.<sup>67,127–131</sup> FFG volume further contributes reliably to discriminative predictive patterns of social functioning and psychosis transition in high-risk individuals.<sup>132,133</sup> Importantly, perceptual deficits such as difficulties to decode complex facial configurations accompany and likely precede aberrant cognitive and affective processing in impaired social cognition.<sup>57,123,127–129</sup> Our data suggest that genetically mediated resilience mechanisms involving the FFA might facilitate social perceptual processing capacities. This hypothesis is supported by reports of increased FFG volume in healthy subjects after social cognitive training.<sup>137</sup> Furthermore, larger FFG volume in patients with schizophrenia appears to mediate the beneficial effects of cognitive training on general neurocognition and social cognition in particular.<sup>138</sup> Together, these findings underscore that increased FFG volume is indeed associated with enhanced cognitive capabilities in multiple domains. They are also compatible with the role of the FFG as a central relay between low level visual and higher cognitive areas in support of a wide array of non-social and social cognitive processes.

A crucial role of social cognition for resilience to schizophrenia is conceivable, as it constitutes a major predictor of functional outcome<sup>125</sup> and can compensate for the deleterious effects of neurocognitive deficits on daily life.<sup>139–144</sup> Therefore, FFG related



resilience mechanisms enhance cognitive functions which facilitate the embedding of individuals in their social environment, thus buffering against the effects of risk factors. Expanded computational resources in the ventral visual pathway should also facilitate coping with stressors resulting from sensory deficits. Typically, resilience models emphasize the ability to cope with stressors such as challenging life circumstances and physical illness.<sup>3,6,145</sup> However, perturbed visual information processing in schizophrenia might in itself constitute a stressor. In addition to deficits in perceptual organization, characteristic disturbances comprise a lower threshold for sensory overload,<sup>146</sup> visual distortions,<sup>146,147</sup> reduced predictability of changes in the environment and resulting uncertainty regarding adequate behavior<sup>31</sup> as well as psychotic experiences.<sup>75,148</sup> These in turn have detrimental effects on adaptive behavior and interpersonal interactions, together constituting a fundamental stressor. Given the widespread deleterious impact of stress on cognition,<sup>149,150</sup> this might lead to a vicious cycle of increasing psychosocial stress, aberrant information processing and psychosis proneness.<sup>20</sup> Through increased perceptual and cognitive capabilities, the resilience mechanisms implied by our data should reduce stress induced by subtle perceptual impairments and increase the chances of interrupting this vicious cycle. It remains to be clarified whether increased FFG resources promote a resilience mechanism that directly antagonizes potential cognitive disturbances or rather mitigates cognitive deficits by compensating for disease-related abnormalities. The latter would be consistent with the idea that, on the neurobiological level, resilience does not simply reverse pathophysiological processes but rather ameliorates the harmful consequences of stressors.<sup>3</sup>

Overall, our findings point towards a central role of visual cognition in schizophrenia resilience as both a stressor and a coping mechanism. Furthermore, our results provide a crucial link between genetics, the information processing disorder concept

and the vulnerability-stress model.<sup>22</sup> Interestingly, there is preliminary evidence for an involvement of the FFG and neighboring occipito-temporal areas in resilience against stress and adverse life events,<sup>151</sup> trauma,<sup>152</sup> and bipolar disorder,<sup>153,154</sup> suggesting a potential transdiagnostic relevance of visual cognition as a resilience mechanism.

Lastly, current findings create an interesting link to resilience models derived from C/E blindness research.<sup>34</sup> They suggest that SNPs associated with resilience to schizophrenia can drive some of the neuroplastic changes in visual areas that are also observed in early reorganization following C/E blindness.<sup>49,50</sup> The convergence of such widely different biological mechanisms on a similar intermediate phenotype underscores the significance of the visual brain for schizophrenia resilience research. Importantly, this also raises the possibility that similar protective adaptations might be inducible through targeted interventions.<sup>75</sup> Such interventions would likely have to occur at early stages of post-natal development when the visual system is susceptible to environmental influences.<sup>155,156</sup> This is suggested by the lack of a protective effect in late blindness,<sup>35</sup> the early start and prolonged trajectory of abnormal neurodevelopment in schizophrenia<sup>16</sup>, as well as the early manifestation of visual dysfunction in at-risk populations.<sup>78,157–159</sup>

Our findings provide a novel direction for schizophrenia resilience research by demonstrating that resilience to the disorder might arise from genetic influences that act on neural systems subserving elementary cognitive processes. However, the indirect nature of the current evidence is an important limitation of our study. The cognitive implications of our findings can so far only be inferred from existing evidence for an association of FFG volume and cognition and the crucial functional role of the FFG within the ventral visual pathway. Here, a direct investigation of links between cognition and  $PRS_{Resilience}$  effects on FFG morphology was limited to publicly accessible cognitive measures in the UKBB (see Supplementary Material), which are

not tailored toward schizophrenia research and our findings specifically. Furthermore, the current imaging genetics approach cannot provide evidence that individuals with higher  $PRS_{Resilience}$  would indeed be more adaptable to the specific stressors implicated by our findings. These questions need to be addressed in future studies. Moreover, while our data suggest that structural neuroplastic alterations in the FFG contribute most prominently to schizophrenia resilience compared to other cortical areas, neuroimaging methods directly assessing brain function as well as structural and functional connectomics will be essential to elucidate the underlying mechanisms more completely. It is also highly likely that these methods will reveal additional, potentially unrelated resilience promoting neural circuits that sMRI is not sensitive for.

In conclusion, our study contributes to models of schizophrenia resilience by demonstrating an impact of genetic variants conferring protection from the disorder on local brain structure in the visual system. Improved cognitive and functional capacities that may result from these effects suggest a resilience mechanism linked to coping with both the cognitive and psychosocial sequelae of stressors. Future studies should investigate directly the individual contributions of the cognitive processes implicated by our findings to schizophrenia resilience in healthy and at-risk populations. Moreover, it will be imperative to investigate the interaction between genetic and environmental risk factors with resilience factors in order to fully realize the potential of the resilience paradigm for the discovery of novel course-modifying and preventive interventions for schizophrenia.

## **FUNDING**

M.D.H. is funded by the German Federal Ministry of Education and Research (BMBF) and the Max Planck Society. E.R. is supported by a Research Grant for Doctoral Programmes in Germany from The German Academic Exchange Service (DAAD). A.R. is supported by the German Research Foundation (DFG) (CRC 1193 Z03). D.E.J.L. is supported by the MRC Centre for Neuropsychiatric Genetics and Genomics (MR/L010305/1).

## **ACKNOWLEDGEMENTS**

The authors thank Christina Novak and Astrid Rehner for help with recruiting and data acquisition. We also thank Caroline Mann and Thorsten Kranz for advice regarding data processing and genetic analyses, respectively.

## **DISCLOSURES**

The authors have declared that there are no conflicts of interest in relation to the subject of this study.

## **AUTHOR CONTRIBUTIONS**

Conceptualization: MDH, RAB

Methodology: MDH, TL, ER, NRM, RAB

Investigation: PKH, MDH, TL, RAB

Visualization: MDH

Supervision: RAB

Writing – original draft: MDH, RAB

Writing – review and editing: MDH, TL, WS, AR, DEJL, RAB

## AVAILABILITY OF DATA AND MATERIALS

The datasets generated during and/or analyzed during the current study are available from the corresponding author on reasonable request.

## FIGURE LEGENDS

**Figure 1.** Whole-brain correlation between schizophrenia polygenic resilience scores ( $PRS_{Resilience}$ ) and cortical volume (cluster-wise  $p < .05$  corrected) (A). Surface area (B) and cortical thickness (C) values in the right fusiform gyrus plotted against  $PRS_{Resilience}$ .

**Figure 2.** Effects of schizophrenia polygenic resilience scores ( $PRS_{Resilience}$ ) on fusiform gyrus (FFG) anatomical metrics in the UK Biobank sample. A) Desikan-Killiany<sup>96</sup> (DK) FFG parcels. B) Significant  $PRS_{Resilience}$  effects for cortical volume and surface area in the left FFG (error bars: 95% confidence intervals). C)  $PRS_{Resilience}$  effects on FFG metrics averaged across hemispheres compared to the distribution of effect sizes (betas) for the other 32 DK parcels, also averaged for each anatomical region across hemispheres.

## REFERENCES

1. Feder A, Nestler EJ, Charney DS. Psychobiology and molecular genetics of resilience. *Nat Rev Neurosci*. 2009;10(6):446-457. doi:10.1038/nrn2649
2. Cathomas F, Murrough JW, Nestler EJ, Han MH, Russo SJ. Neurobiology of Resilience: Interface Between Mind and Body. *Biol Psychiatry*. 2019;86(6):410-420. doi:10.1016/j.biopsych.2019.04.011
3. Feder A, Fred-Torres S, Southwick SM, Charney DS. The Biology of Human Resilience: Opportunities for Enhancing Resilience Across the Life Span. *Biol Psychiatry*. 2019;86(6):443-453. doi:10.1016/j.biopsych.2019.07.012
4. Morgan C, O'Donovan M, Bittner RA, et al. How Can Risk and Resilience Factors Be Leveraged to Optimize Discovery Pathways? In: Silverstein S, Moghaddam B, Wykes T, eds. *Schizophrenia: Evolution and Synthesis*. Cambridge; 2013:139-164. <http://www.ncbi.nlm.nih.gov/pubmed/33886220>.
5. Choi KW, Stein MB, Dunn EC, Koenen KC, Smoller JW. Genomics and psychological resilience: a research agenda. *Mol Psychiatry*. 2019;24(12):1770-1778. doi:10.1038/s41380-019-0457-6
6. Kalisch R, Baker DG, Basten U, et al. The resilience framework as a strategy to combat stress-related disorders. *Nat Hum Behav*. 2017;1(11):784-790. doi:10.1038/s41562-017-0200-8
7. Malhi GS, Das P, Bell E, Mattingly G, Mannie Z. Modelling resilience in adolescence and adversity: a novel framework to inform research and practice. *Transl Psychiatry*. 2019;9(1):316. doi:10.1038/s41398-019-0651-y
8. Masten AS. Resilience in children threatened by extreme adversity: Frameworks for research, practice, and translational synergy. *Dev Psychopathol*. 2011;23(2):493-506. doi:10.1017/S0954579411000198

9. Boardman JD, Blalock CL, Button TMM. Sex differences in the heritability of resilience. *Twin Res Hum Genet.* 2008;11(1):12-27. doi:10.1375/twin.11.1.12
10. Amstadter AB, Myers JM, Kendler KS. Psychiatric resilience: Longitudinal twin study. *Br J Psychiatry.* 2014;205(4):275-280. doi:10.1192/bjp.bp.113.130906
11. Waaktaar T, Torgersen S. Genetic and environmental causes of variation in trait resilience in young people. *Behav Genet.* 2012;42(3):366-377. doi:10.1007/s10519-011-9519-5
12. Okbay A, Baselmans BML, De Neve J-E, et al. Genetic variants associated with subjective well-being, depressive symptoms, and neuroticism identified through genome-wide analyses. *Nat Genet.* 2016;48(6):624-633. doi:10.1038/ng.3552
13. Stein MB, Choi KW, Jain S, et al. Genome-wide analyses of psychological resilience in U.S. Army soldiers. *Am J Med Genet Part B Neuropsychiatr Genet.* 2019;180(5):310-319. doi:10.1002/ajmg.b.32730
14. Wingo AP, Almli LM, Stevens JS, et al. Genome-wide association study of positive emotion identifies a genetic variant and a role for microRNAs. *Mol Psychiatry.* 2017;22(5):774-783. doi:10.1038/mp.2016.143
15. Nievergelt CM, Maihofer AX, Miller MW, Logue MW, Geyer MA. Genomic predictors of combat stress vulnerability and resilience in U.S. Marines: A genome-wide association study across multiple ancestries implicates PRTFDC1 as a potential PTSD gene. *Psychoneuroendocrinology.* 2015;51:459-471. doi:10.1016/j.psyneuen.2014.10.017
16. Davis J, Eyre H, Jacka FN, et al. A review of vulnerability and risks for schizophrenia: Beyond the two hit hypothesis. *Neurosci Biobehav Rev.* 2016;65:185-194. doi:10.1016/j.neubiorev.2016.03.017
17. Marengo S, Weinberger DR. The neurodevelopmental hypothesis of schizophrenia: Following a trail of evidence from cradle to grave. *Dev*

- Psychopathol.* 2000;12(3):501-527. doi:10.1017/S0954579400003138
18. Millan MJ, Andrieux A, Bartzokis G, et al. Altering the course of schizophrenia: progress and perspectives. *Nat Rev Drug Discov.* 2016;15(7):485-515. doi:10.1038/nrd.2016.28
  19. Nuechterlein KH. Vulnerability / Stress Model of Schizophrenic Episodes. *Schizophr Bull.* 1982;10(2):300-312.
  20. Howes OD, Murray RM. Schizophrenia: an integrated sociodevelopmental-cognitive model. *Lancet.* 2014;383(9929):1677-1687. doi:10.1016/S0140-6736(13)62036-X
  21. Kahn RS, Keefe RSE. Schizophrenia Is a Cognitive Illness. *JAMA Psychiatry.* 2013;70(10):1107. doi:10.1001/jamapsychiatry.2013.155
  22. Nuechterlein KH, Dawson ME, Green MF. Information-processing abnormalities as neuropsychological vulnerability indicators for schizophrenia. *Acta Psychiatr Scand.* 1994;90(s384):71-79. doi:10.1111/j.1600-0447.1994.tb05894.x
  23. Oertel-Knöchel V, Bittner RA, Knöchel C, Prvulovic D, Hampel H. Discovery and development of integrative biological markers for schizophrenia. *Prog Neurobiol.* 2011;95(4):686-702. doi:10.1016/j.pneurobio.2011.05.006
  24. Hilker R, Helenius D, Fagerlund B, et al. Heritability of Schizophrenia and Schizophrenia Spectrum Based on the Nationwide Danish Twin Register. *Biol Psychiatry.* 2018;83(6):492-498. doi:10.1016/j.biopsych.2017.08.017
  25. Ripke S, Neale BM, Corvin A, et al. Biological insights from 108 schizophrenia-associated genetic loci. *Nature.* 2014;511(7510):421-427. doi:10.1038/nature13595
  26. Pardiñas AF, Holmans P, Pocklington AJ, et al. Common schizophrenia alleles are enriched in mutation-intolerant genes and in regions under strong background selection. *Nat Genet.* 2018;50(3):381-389. doi:10.1038/s41588-



018-0059-2

27. Marshall CR, Howrigan DP, Merico D, et al. Contribution of copy number variants to schizophrenia from a genome-wide study of 41,321 subjects. *Nat Genet.* 2017;49(1):27-35. doi:10.1038/ng.3725
28. Schizophrenia TI, Consortium. Common polygenic variation contributes to risk of schizophrenia and bipolar disorder. *Nature.* 2009;460(7256):748-752. doi:10.1038/nature08185
29. Hess JL, Tylee DS, Mattheisen M, et al. A polygenic resilience score moderates the genetic risk for schizophrenia. *Mol Psychiatry.* 2021;26(3):800-815. doi:10.1038/s41380-019-0463-8
30. Ripke S, Sanders AR, Kendler KS, et al. Genome-wide association study identifies five new schizophrenia loci. *Nat Genet.* 2011;43(10):969-978. doi:10.1038/ng.940
31. Pollak TA, Corlett PR. Blindness, Psychosis, and the Visual Construction of the World. *Schizophr Bull.* 2019;46(6):1418-1425. doi:10.1093/schbul/sbz098
32. Davies C, Segre G, Estradé A, et al. Prenatal and perinatal risk and protective factors for psychosis: a systematic review and meta-analysis. *The Lancet Psychiatry.* 2020;7(5):399-410. doi:10.1016/S2215-0366(20)30057-2
33. Cullen AE, Holmes S, Pollak TA, et al. Associations Between Non-neurological Autoimmune Disorders and Psychosis: A Meta-analysis. *Biol Psychiatry.* 2019;85(1):35-48. doi:10.1016/j.biopsych.2018.06.016
34. Landgraf S, Osterheider M. “To see or not to see: that is the question.” The “Protection-Against-Schizophrenia” (PaSZ) model: evidence from congenital blindness and visuo-cognitive aberrations. *Front Psychol.* 2013;4(JUL):1-23. doi:10.3389/fpsyg.2013.00352
35. Silverstein SM, Wang Y, Keane BP. Cognitive and Neuroplasticity Mechanisms

- by Which Congenital or Early Blindness May Confer a Protective Effect Against Schizophrenia. *Front Psychol.* 2013;3(12):1327-1328. doi:10.3389/fpsyg.2012.00624
36. Sanders GS, Platek SM, Gallup GG. No blind schizophrenics: Are NMDA-receptor dynamics involved? *Behav Brain Sci.* 2003;26(1):103-104. doi:10.1017/S0140525X03420025
37. Silverstein SM, Wang Y, Roché MW. Base rates, blindness, and schizophrenia. *Front Psychol.* 2013;4:3-4. doi:10.3389/fpsyg.2013.00157
38. Morgan VA, Clark M, Crewe J, et al. Congenital blindness is protective for schizophrenia and other psychotic illness. A whole-population study. *Schizophr Res.* 2018;202:414-416. doi:10.1016/j.schres.2018.06.061
39. Checkley SA, Slade AP. Blindness and schizophrenia. *Lancet.* 1979;313(8118):730-731. doi:10.1016/S0140-6736(79)91188-7
40. Leivada E, Boeckx C. Schizophrenia and cortical blindness: Protective effects and implications for language. *Front Hum Neurosci.* 2014;8:1-12. doi:10.3389/fnhum.2014.00940
41. Thewissen V, Myin-Germeys I, Bentall R, de Graaf R, Vollebergh W, van Os J. Hearing impairment and psychosis revisited. *Schizophr Res.* 2005;76(1):99-103. doi:10.1016/j.schres.2004.10.013
42. Bolat N, Doğangün B, Yavuz M, Demir T, Kayaalp L. Depression and anxiety levels and self-concept characteristics of adolescents with congenital complete visual impairment. *Turk Psikiyatri Derg.* 2011;22(2):77-82. <http://www.ncbi.nlm.nih.gov/pubmed/21638229>.
43. Carvill S. Sensory impairments, intellectual disability and psychiatry. *J Intellect Disabil Res.* 2001;45(6):467-483. doi:10.1046/j.1365-2788.2001.00366.x
44. Ek U, Fernell E, Jacobson L, Gillberg C. Relation between blindness due to

- retinopathy of prematurity and autistic spectrum disorders: a population-based study. *Dev Med Child Neurol*. 1998;40(5):297-301. doi:9630256
45. Keeler WR. Autistic patterns and defective communication in blind children with retrolental fibroplasia. *Proc Annu Meet Am Psychopathol Assoc*. 1956:64-83. <http://www.ncbi.nlm.nih.gov/pubmed/13518120>.
46. Sharp CW. Anorexia Nervosa and Depression in a Woman Blind since the Age of Nine Months. *Can J Psychiatry*. 1993;38(7):469-471. doi:10.1177/070674379303800701
47. Ricciardi E, Bonino D, Pellegrini S, Pietrini P. Mind the blind brain to understand the sighted one! Is there a supramodal cortical functional architecture? *Neurosci Biobehav Rev*. 2014;41:64-77. doi:10.1016/j.neubiorev.2013.10.006
48. Bedny M. Evidence from Blindness for a Cognitively Pluripotent Cortex. *Trends Cogn Sci*. 2017;21(9):637-648. doi:10.1016/j.tics.2017.06.003
49. Voss P, Pike BG, Zatorre RJ. Evidence for both compensatory plastic and disuse atrophy-related neuroanatomical changes in the blind. *Brain*. 2014;137(4):1224-1240. doi:10.1093/brain/awu030
50. Park HJ, Lee JD, Kim EY, et al. Morphological alterations in the congenital blind based on the analysis of cortical thickness and surface area. *Neuroimage*. 2009;47(1):98-106. doi:10.1016/j.neuroimage.2009.03.076
51. Ptito M, Matteau I, Zhi Wang A, Paulson OB, Siebner HR, Kupers R. Crossmodal Recruitment of the Ventral Visual Stream in Congenital Blindness. *Neural Plast*. 2012;2012:1-9. doi:10.1155/2012/304045
52. Heine L, Bahri MA, Cavaliere C, et al. Prevalence of increases in functional connectivity in visual, somatosensory and language areas in congenital blindness. *Front Neuroanat*. 2015;9:86. doi:10.3389/fnana.2015.00086
53. Friston K. A theory of cortical responses. *Philos Trans R Soc B Biol Sci*.

- 2005;360(1456):815-836. doi:10.1098/rstb.2005.1622
54. Rao RPN, Ballard DH. Predictive coding in the visual cortex: a functional interpretation of some extra-classical receptive-field effects. *Nat Neurosci.* 1999;2(1):79-87. doi:10.1038/4580
55. Sterzer P, Adams RA, Fletcher P, et al. The Predictive Coding Account of Psychosis. *Biol Psychiatry.* 2018;84(9):634-643. doi:10.1016/j.biopsych.2018.05.015
56. Kanat-Maymon Y, Ben-David BM. Small numbers are not predictive: Congenital blindness may or may not be protective for schizophrenia. *Schizophr Res.* 2019;209:274. doi:10.1016/j.schres.2019.04.023
57. Jepsen OH, Petersen LV, Bek T, Østergaard SD. Is Early Blindness Protective of Psychosis or Are We Turning a Blind Eye to the Lack of Statistical Power? *Schizophr Bull.* 2020;46(6):1335-1336. doi:10.1093/schbul/sbaa048
58. Martinez A, Hillyard SA, Bickel S, Dias EC, Butler PD, Javitt DC. Consequences of Magnocellular Dysfunction on Processing Attended Information in Schizophrenia. *Cereb Cortex.* 2012;22(6):1282-1293. doi:10.1093/cercor/bhr195
59. Halász I, Levy-Gigi E, Kelemen O, Benedek G, Kéri S. Neuropsychological functions and visual contrast sensitivity in schizophrenia: the potential impact of comorbid posttraumatic stress disorder (PTSD). *Front Psychol.* 2013;4:136. doi:10.3389/fpsyg.2013.00136
60. Butler PD, Zemon V, Schechter I, et al. Early-Stage Visual Processing and Cortical Amplification Deficits in Schizophrenia. *Arch Gen Psychiatry.* 2005;62(5):495. doi:10.1001/archpsyc.62.5.495
61. Butler PD, Silverstein SM, Dakin SC. Visual Perception and Its Impairment in Schizophrenia. *Biol Psychiatry.* 2008;64(1):40-47.

doi:10.1016/j.biopsycho.2008.03.023

62. Silverstein SM, Keane BP. Perceptual organization impairment in schizophrenia and associated brain mechanisms: review of research from 2005 to 2010. *Schizophr Bull.* 2011;37(4):690-699. doi:10.1093/schbul/sbr052
63. Butler PD, Thompson JL, Seitz AR, Deveau J, Silverstein SM. Visual perceptual remediation for individuals with schizophrenia: Rationale, method, and three case studies. *Psychiatr Rehabil J.* 2017;40(1):43-52. doi:10.1037/prj0000212
64. Chen Y. Abnormal Visual Motion Processing in Schizophrenia: A Review of Research Progress. *Schizophr Bull.* 2011;37(4):709-715. doi:10.1093/schbul/sbr020
65. Sehatpour P, Dias EC, Butler PD, et al. Impaired Visual Object Processing Across an Occipital-Frontal-Hippocampal Brain Network in Schizophrenia. *Arch Gen Psychiatry.* 2010;67(8):772. doi:10.1001/archgenpsychiatry.2010.85
66. Tadin D, Kim J, Doop ML, et al. Weakened center-surround interactions in visual motion processing in schizophrenia. *J Neurosci.* 2006;26(44):11403-11412. doi:10.1523/JNEUROSCI.2592-06.2006
67. Javitt DC. When doors of perception close: Bottom-up models of disrupted cognition in schizophrenia. *Annu Rev Clin Psychol.* 2009;5:249-275. doi:10.1146/annurev.clinpsy.032408.153502
68. Bittner RA, Linden DEJ, Roebroek A, et al. The When and Where of Working Memory Dysfunction in Early-Onset Schizophrenia—A Functional Magnetic Resonance Imaging Study. *Cereb Cortex.* 2015;25(9):2494-2506. doi:10.1093/cercor/bhu050
69. Butler PD, Abeles IY, Weiskopf NG, et al. Sensory contributions to impaired emotion processing in schizophrenia. *Schizophr Bull.* 2009;35(6):1095-1107. doi:10.1093/schbul/sbp109

70. Dias EC, Butler PD, Hoptman MJ, Javitt DC. Early sensory contributions to contextual encoding deficits in schizophrenia. *Arch Gen Psychiatry*. 2011;68(7):654-664. doi:10.1001/archgenpsychiatry.2011.17
71. Haenschel C, Bittner RA, Haertling F, et al. Contribution of Impaired Early-Stage Visual Processing to Working Memory Dysfunction in Adolescents With Schizophrenia. *Arch Gen Psychiatry*. 2007;64(11):1229. doi:10.1001/archpsyc.64.11.1229
72. Revheim N, Corcoran CM, Dias E, et al. Reading deficits in schizophrenia and individuals at high clinical risk: relationship to sensory function, course of illness, and psychosocial outcome. *Am J Psychiatry*. 2014;171(9):949-959. doi:10.1176/appi.ajp.2014.13091196
73. Green MF, Helleman G, Horan WP, Lee J, Wynn JK. From perception to functional outcome in schizophrenia: modeling the role of ability and motivation. *Arch Gen Psychiatry*. 2012;69(12):1216-1224. doi:10.1001/archgenpsychiatry.2012.652
74. Rassovsky Y, Horan WP, Lee J, Sergi MJ, Green MF. Pathways between early visual processing and functional outcome in schizophrenia. *Psychol Med*. 2011;41(3):487-497. doi:10.1017/S0033291710001054
75. Silverstein SM, Seitz AR, Ahmed AO, et al. Development and Evaluation of a Visual Remediation Intervention for People with Schizophrenia. *J Psychiatry Brain Sci*. 2020;4(3):e200017. doi:10.20900/jpbs.20200017
76. Deng Y, Liu K, Cheng D, et al. Ventral and dorsal visual pathways exhibit abnormalities of static and dynamic connectivities, respectively, in patients with schizophrenia. *Schizophr Res*. 2019;206:103-110. doi:10.1016/j.schres.2018.12.005
77. Plomp G, Roinishvili M, Chkonia E, et al. Electrophysiological Evidence for

- Ventral Stream Deficits in Schizophrenia Patients. *Schizophr Bull.* 2013;39(3):547-554. doi:10.1093/schbul/sbr175
78. Klosterkötter J, Hellmich M, Steinmeyer EM, Schultze-Lutter F. Diagnosing Schizophrenia in the Initial Prodromal Phase. *Arch Gen Psychiatry.* 2001;58(2):158-164. doi:10.1001/archpsyc.58.2.158
79. Schubert EW, Henriksson KM, McNeil TF. A prospective study of offspring of women with psychosis: visual dysfunction in early childhood predicts schizophrenia-spectrum disorders in adulthood. *Acta Psychiatr Scand.* 2005;112(5):385-393. doi:10.1111/j.1600-0447.2005.00584.x
80. Tansey KE, Rees E, Linden DE, et al. Common alleles contribute to schizophrenia in CNV carriers. *Mol Psychiatry.* 2016;21(8):1085-1089. doi:10.1038/mp.2015.143
81. Bellenguez C, Grenier-Boley B, Lambert J-C. Genetics of Alzheimer's disease: where we are, and where we are going. *Curr Opin Neurobiol.* 2020;61:40-48. doi:10.1016/j.conb.2019.11.024
82. Sass H, Wittchen H. *Diagnostisches Und Statistisches Manual Psychischer Störungen.* Bern, Switzerland: Hogrefe; 2003.
83. Oldfield RC. The Assessment and Analysis of Handedness: The Edinburgh Inventory. *Neuropsychologia.* 1971;9:97-113.
84. Lehrl S, Triebig G, Fischer B. Multiple choice vocabulary test MWT as a valid and short test to estimate premorbid intelligence. *Acta Neurol Scand.* 1995;91(5):335-345. doi:10.1111/j.1600-0404.1995.tb07018.x
85. Lam M, Awasthi S, Watson HJ, et al. RICOPIIL: Rapid Imputation for COnsortias PIpeLLine. Schwartz R, ed. *Bioinformatics.* 2019;36(3):930-933. doi:10.1093/bioinformatics/btz633
86. Choi SW, Reilly PFO. PRSice-2: Polygenic Risk Score software for biobank-



- scale data. *Gigascience*. 2019;8(7):giz082. doi:10.1093/gigascience/giz082
87. Euesden J, Lewis CM, O'Reilly PF. PRSice: Polygenic Risk Score software. *Bioinformatics*. 2015;31(9):1466-1468. doi:10.1093/bioinformatics/btu848
88. Deichmann R, Schwarzbauer C, Turner R. Optimisation of the 3D MDEFT sequence for anatomical brain imaging: technical implications at 1.5 and 3 T. *Neuroimage*. 2004;21(2):757-767. doi:10.1016/j.neuroimage.2003.09.062
89. Zhang Y, Brady M, Smith S. Segmentation of brain MR images through a hidden Markov random field model and the expectation-maximization algorithm. *IEEE Trans Med Imaging*. 2001;20(1):45-57. doi:10.1109/42.906424
90. Tustison NJ, Avants BB, Cook PA, et al. N4ITK: Improved N3 Bias Correction. *IEEE Trans Med Imaging*. 2010;29(6):1310-1320. doi:10.1109/TMI.2010.2046908
91. Fischl B, Dale AM. Measuring the thickness of the human cerebral cortex from magnetic resonance images. *PNAS*. 2000;97(20):11050-11055.
92. Winkler AM, Sabuncu MR, Yeo BTT, et al. Measuring and comparing brain cortical surface area and other areal quantities. *Neuroimage*. 2012;61(4):1428-1443. doi:10.1016/j.neuroimage.2012.03.026
93. Hagler DJ, Saygin AP, Sereno MI. Smoothing and cluster thresholding for cortical surface-based group analysis of fMRI data. *Neuroimage*. 2006;33(4):1093-1103. doi:10.1016/j.neuroimage.2006.07.036
94. Greve DN, Fischl B. False positive rates in surface-based anatomical analysis. *Neuroimage*. 2018;171:6-14. doi:10.1016/j.neuroimage.2017.12.072
95. Miller KL, Alfaro-Almagro F, Bangerter NK, et al. Multimodal population brain imaging in the UK Biobank prospective epidemiological study. *Nat Neurosci*. 2016;19(11):1523-1536. doi:10.1038/nn.4393
96. Desikan RS, Ségonne F, Fischl B, et al. An automated labeling system for



- subdividing the human cerebral cortex on MRI scans into gyral based regions of interest. *Neuroimage*. 2006;31(3):968-980.  
doi:10.1016/j.neuroimage.2006.01.021
97. Johnson T. Package 'gtx.' 2013.
98. International Consortium for Blood Pressure Genome-Wide Association Studies, Ehret GB, Munroe PB, Rice KM, Bochud M, Johnson AD, Chasman DI, Smith AV, Tobin MD, Verwoert GC, Hwang SJ, Pihur V, Vollenweider P, O'Reilly PF, Amin N, Bragg-Gresham JL, Teumer JT. Genetic variants in novel pathways influence blood pressure and cardiovascular disease risk. *Nature*. 2011;478(7367):103-109. doi:10.1038/nature10405
99. Lancaster TM, Hill MJ, Sims R, Williams J. Microglia – mediated immunity partly contributes to the genetic association between Alzheimer's disease and hippocampal volume. *Brain Behav Immun*. 2019;79:267-273. doi:10.1016/j.bbi.2019.02.011
100. Palla L, Dudbridge F. A Fast Method that Uses Polygenic Scores to Estimate the Variance Explained by Genome-wide Marker Panels and the Proportion of Variants Affecting a Trait. *Am J Hum Genet*. 2015;97(2):250-259. doi:10.1016/j.ajhg.2015.06.005
101. Weiner KS. The Mid-Fusiform Sulcus ( sulcus sagittalis gyri fusiformis ). *Anat Rec*. 2019;302(9):1491-1503. doi:10.1002/ar.24041
102. Rosenke M, van Hoof R, van den Hurk J, Grill-Spector K, Goebel R. A Probabilistic Functional Atlas of Human Occipito-Temporal Visual Cortex. *Cereb Cortex*. 2021;31(1):603-619. doi:10.1093/cercor/bhaa246
103. Tahmasebi AM, Artiges E, Banaschewski T, et al. Creating probabilistic maps of the face network in the adolescent brain: A multicentre functional MRI study. *Hum Brain Mapp*. 2012;33(4):938-957. doi:10.1002/hbm.21261

104. Zhen Z, Yang Z, Huang L, et al. Quantifying interindividual variability and asymmetry of face-selective regions: A probabilistic functional atlas. *Neuroimage*. 2015;113:13-25. doi:10.1016/j.neuroimage.2015.03.010
105. Chelazzi L, Duncan J, Miller EK, Desimone R. Responses of Neurons in Inferior Temporal Cortex During Memory-Guided Visual Search. *J Neurophysiol*. 1998;80(6):2918-2940. doi:10.1152/jn.1998.80.6.2918
106. Luck SJ, Hillyard SA, Mangun GR, Gazzaniga MS. Independent Attentional Scanning in the Separated Hemispheres of Split-Brain Patients. *J Cogn Neurosci*. 1994;6(1):84-91. doi:10.1162/jocn.1994.6.1.84
107. Rousselet GA, Thorpe SJ, Fabre-Thorpe M. How parallel is visual processing in the ventral pathway? *Trends Cogn Sci*. 2004;8(8):363-370. doi:10.1016/j.tics.2004.06.003
108. Ungerleider LG, Mishkin M. Two cortical visual systems. In: Ingle DJ et al., ed. *Analysis of Visual Behaviour*. MIT Press; 1982:549-586.
109. Kravitz DJ, Saleem KS, Baker CI, Ungerleider LG, Mishkin M. The ventral visual pathway: an expanded neural framework for the processing of object quality. *Trends Cogn Sci*. 2013;17(1):26-49. doi:10.1016/j.tics.2012.10.011
110. Grill-Spector K, Weiner KS. The functional architecture of the ventral temporal cortex and its role in categorization. *Nat Rev Neurosci*. 2014;15(8):536-548. doi:10.1038/nrn3747
111. Markov NT, Kennedy H. The importance of being hierarchical. *Curr Opin Neurobiol*. 2013;23(2):187-194. doi:10.1016/j.conb.2012.12.008
112. Bullmore E, Sporns O. Complex brain networks: graph theoretical analysis of structural and functional systems. *Nat Rev Neurosci*. 2009;10(3):186-198. doi:10.1038/nrn2575
113. Kar K, Kubilius J, Schmidt K, Issa EB, DiCarlo JJ. Evidence that recurrent circuits

are critical to the ventral stream's execution of core object recognition behavior.

*Nat Neurosci.* 2019;22(6):974-983. doi:10.1038/s41593-019-0392-5

114. Kar K, DiCarlo JJ. Fast Recurrent Processing via Ventrolateral Prefrontal Cortex Is Needed by the Primate Ventral Stream for Robust Core Visual Object Recognition. *Neuron.* 2021;109(1):164-176.e5. doi:10.1016/j.neuron.2020.09.035
115. Kravitz DJ, Saleem KS, Baker CI, Mishkin M. A new neural framework for visuospatial processing. *Nat Rev Neurosci.* 2011;12(4):217-230. doi:10.1038/nrn3008
116. Caspers J, Zilles K, Eickhoff SB, Schleicher A, Mohlberg H, Amunts K. Cytoarchitectonical analysis and probabilistic mapping of two extrastriate areas of the human posterior fusiform gyrus. *Brain Struct Funct.* 2013;218(2):511-526. doi:10.1007/s00429-012-0411-8
117. Caspers J, Palomero-Gallagher N, Caspers S, Schleicher A, Amunts K, Zilles K. Receptor architecture of visual areas in the face and word-form recognition region of the posterior fusiform gyrus. *Brain Struct Funct.* 2015;220(1):205-219. doi:10.1007/s00429-013-0646-z
118. Weiner KS, Golarai G, Caspers J, et al. The mid-fusiform sulcus: A landmark identifying both cytoarchitectonic and functional divisions of human ventral temporal cortex. *Neuroimage.* 2014;84:453-465. doi:10.1016/j.neuroimage.2013.08.068
119. Saygin ZM, Osher DE, Koldewyn K, Reynolds G, Gabrieli JDE, Saxe RR. Anatomical connectivity patterns predict face selectivity in the fusiform gyrus. *Nat Neurosci.* 2012;15(2):321-327. doi:10.1038/nn.3001
120. Kanwisher N, Yovel G. The fusiform face area: a cortical region specialized for the perception of faces. *Philos Trans R Soc B Biol Sci.* 2006;361(1476):2109-

2128. doi:10.1098/rstb.2006.1934
121. Friston KJ, Stephan KE, Montague R, Dolan RJ. Computational psychiatry: the brain as a phantastic organ. *The Lancet Psychiatry*. 2014;1(2):148-158. doi:10.1016/S2215-0366(14)70275-5
122. Fletcher PC, Frith CD. Perceiving is believing: a Bayesian approach to explaining the positive symptoms of schizophrenia. *Nat Rev Neurosci*. 2009;10(1):48-58. doi:10.1038/nrn2536
123. Schultz RT, Grelotti DJ, Klin A, et al. The role of the fusiform face area in social cognition: Implications for the pathobiology of autism. *Philos Trans R Soc B Biol Sci*. 2003;358(1430):415-427. doi:10.1098/rstb.2002.1208
124. Quintana J, Wong T, Ortiz-Portillo E, Marder SR, Mazziotta JC. Right lateral fusiform gyrus dysfunction during facial information processing in schizophrenia. *Biol Psychiatry*. 2003;53(12):1099-1112. doi:10.1016/S0006-3223(02)01784-5
125. Green MF, Horan WP, Lee J. Social cognition in schizophrenia. *Nat Rev Neurosci*. 2015;16(10):620-631. doi:10.1038/nrn4005
126. Weiner KS, Grill-Spector K. Sparsely-distributed organization of face and limb activations in human ventral temporal cortex. *Neuroimage*. 2010;52(4):1559-1573. doi:10.1016/j.neuroimage.2010.04.262
127. Marosi C, Fodor Z, Csukly G. From basic perception deficits to facial affect recognition impairments in schizophrenia. *Sci Rep*. 2019;9(1):8958. doi:10.1038/s41598-019-45231-x
128. Walther S, Federspiel A, Horn H, et al. Encoding deficit during face processing within the right fusiform face area in schizophrenia. *Psychiatry Res - Neuroimaging*. 2009;172(3):184-191. doi:10.1016/j.psychresns.2008.07.009
129. Pinkham AE, Hopfinger JB, Pelphrey KA, Piven J, Penn DL. Neural bases for impaired social cognition in schizophrenia and autism spectrum disorders.

- Schizophr Res.* 2008;99(1-3):164-175. doi:10.1016/j.schres.2007.10.024
130. Chen Y, Ekstrom T. Visual and Associated Affective Processing of Face Information in Schizophrenia: A Selective Review. *Curr Psychiatry Rev.* 2015;11(4):266-272. doi:10.2174/1573400511666150930000817
131. Lee CU, Shenton ME, Salisbury DF, et al. Fusiform Gyrus Volume Reduction in First-Episode Schizophrenia. *Arch Gen Psychiatry.* 2002;59(9):775. doi:10.1001/archpsyc.59.9.775
132. Koutsouleris N, Kambeitz-Ilankovic L, Ruhrmann S, et al. Prediction Models of Functional Outcomes for Individuals in the Clinical High-Risk State for Psychosis or with Recent-Onset Depression: A Multimodal, Multisite Machine Learning Analysis. *JAMA Psychiatry.* 2018;75(11):1156-1172. doi:10.1001/jamapsychiatry.2018.2165
133. de Wit S, Ziermans TB, Nieuwenhuis M, et al. Individual prediction of long-term outcome in adolescents at ultra-high risk for psychosis: Applying machine learning techniques to brain imaging data. *Hum Brain Mapp.* 2017;38(2):704-714. doi:10.1002/hbm.23410
134. Sergi MJ, Green MF. Social perception and early visual processing in schizophrenia. *Schizophr Res.* 2003;59(2-3):233-241. doi:10.1016/S0920-9964(01)00405-4
135. Phillips WA, Silverstein SM. Convergence of biological and psychological perspectives on cognitive coordination in schizophrenia. *Behav Brain Sci.* 2003;26(1):65-82. doi:10.1017/S0140525X03000025
136. Carter CS, Barch DM, Gur R, Gur R, Pinkham A, Ochsner K. CNTRICS final task selection: social cognitive and affective neuroscience-based measures. *Schizophr Bull.* 2009;35(1):153-162. doi:10.1093/schbul/sbn157
137. Kreifelts B, Jacob H, Brück C, Erb M, Ethofer T, Wildgruber D. Non-verbal

- emotion communication training induces specific changes in brain function and structure. *Front Hum Neurosci*. 2013;7:648. doi:10.3389/fnhum.2013.00648
138. Eack SM, Hogarty GE, Cho RY, et al. Neuroprotective Effects of Cognitive Enhancement Therapy Against Gray Matter Loss in Early Schizophrenia. *Arch Gen Psychiatry*. 2010;67(7):674. doi:10.1001/archgenpsychiatry.2010.63
139. Sergi MJ, Rassovsky Y, Nuechterlein KH, Green MF. Social perception as a mediator of the influence of early visual processing on functional status in schizophrenia. *Am J Psychiatry*. 2006;163(3):448-454. doi:10.1176/appi.ajp.163.3.448
140. Brekke J, Kay DD, Lee KS, Green MF. Biosocial pathways to functional outcome in schizophrenia. *Schizophr Res*. 2005;80(2-3):213-225. doi:10.1016/j.schres.2005.07.008
141. Schmidt SJ, Mueller DR, Roder V. Social cognition as a mediator variable between neurocognition and functional outcome in schizophrenia: Empirical review and new results by structural equation modeling. *Schizophr Bull*. 2011;37(suppl\_2):S41-S54. doi:10.1093/schbul/sbr079
142. Fett A-KJ, Viechtbauer W, Dominguez M-G, Penn DL, van Os J, Krabbendam L. The relationship between neurocognition and social cognition with functional outcomes in schizophrenia: A meta-analysis. *Neurosci Biobehav Rev*. 2011;35(3):573-588. doi:10.1016/j.neubiorev.2010.07.001
143. Couture SM. The Functional Significance of Social Cognition in Schizophrenia: A Review. *Schizophr Bull*. 2006;32(Supplement 1):S44-S63. doi:10.1093/schbul/sbl029
144. Hakkaart-van Roijen L, Bouwmans C, de Sonnevile C, Mulder C. Employment and the associated impact on quality of life in people diagnosed with schizophrenia. *Neuropsychiatr Dis Treat*. 2015;11:2125–2142.

doi:10.2147/NDT.S83546

145. Elbau IG, Cruceanu C, Binder EB. Genetics of Resilience: Gene-by-Environment Interaction Studies as a Tool to Dissect Mechanisms of Resilience. *Biol Psychiatry*. 2019;86(6):433-442. doi:10.1016/j.biopsych.2019.04.025
146. Kiss I, Fábíán Á, Benedek G, Kéri S. When doors of perception open: Visual contrast sensitivity in never-medicated, first-episode schizophrenia. *J Abnorm Psychol*. 2010;119(3):586-593. doi:10.1037/a0019610
147. Kéri S, Kiss I, Kelemen O, Benedek G, Janka Z. Anomalous visual experiences, negative symptoms, perceptual organization and the magnocellular pathway in schizophrenia: a shared construct? *Psychol Med*. 2005;35(10):1445-1455. doi:10.1017/S0033291705005398
148. Keane BP, Cruz LN, Paterno D, Silverstein SM. Self-Reported Visual Perceptual Abnormalities Are Strongly Associated with Core Clinical Features in Psychotic Disorders. *Front Psychiatry*. 2018;9:69. doi:10.3389/fpsyt.2018.00069
149. Arnsten AFT. Stress weakens prefrontal networks: molecular insults to higher cognition. *Nat Neurosci*. 2015;18(10):1376-1385. doi:10.1038/nn.4087
150. Liston C, McEwen BS, Casey BJ. Psychosocial stress reversibly disrupts prefrontal processing and attentional control. *Proc Natl Acad Sci*. 2009;106(3):912-917. doi:10.1073/pnas.0807041106
151. Kahl M, Wagner G, de la Cruz F, Köhler S, Schultz CC. Resilience and cortical thickness: a MRI study. *Eur Arch Psychiatry Clin Neurosci*. 2020;270(5):533-539. doi:10.1007/s00406-018-0963-6
152. Van der Werff SJA, Pannekoek JN, Veer IM, et al. Resilience to childhood maltreatment is associated with increased resting-state functional connectivity of the salience network with the lingual gyrus. *Child Abus Negl*. 2013;37(11):1021-1029. doi:10.1016/j.chiabu.2013.07.008



153. Dima D, Roberts RE, Frangou S. Connectomic markers of disease expression, genetic risk and resilience in bipolar disorder. *Transl Psychiatry*. 2016;6(October 2015):1-7. doi:10.1038/tp.2015.193
154. Frangou S. Neuroimaging Markers of Risk, Disease Expression, and Resilience to Bipolar Disorder. *Curr Psychiatry Rep*. 2019;21(7):52. doi:10.1007/s11920-019-1039-7
155. Singer W. Development and Plasticity of Cortical Processing Architectures. *Science (80- )*. 1995;270(5237):758-764. doi:10.1126/science.270.5237.758
156. Luby JL, Baram TZ, Rogers CE, Barch DM. Neurodevelopmental Optimization after Early-Life Adversity: Cross-Species Studies to Elucidate Sensitive Periods and Brain Mechanisms to Inform Early Intervention. *Trends Neurosci*. 2020;43(10):744-751. doi:10.1016/j.tins.2020.08.001
157. Hambrecht M, Lammertink M, Klosterkötter J, Matuschek E, Pukrop R. Subjective and objective neuropsychological abnormalities in a psychosis prodrome clinic. *Br J Psychiatry Suppl*. 2002;43:s30-7. doi:10.1192/bjp.181.43.s30
158. Schiffman J, Maeda JA, Hayashi K, et al. Premorbid childhood ocular alignment abnormalities and adult schizophrenia-spectrum disorder. *Schizophr Res*. 2006;81(2-3):253-260. doi:10.1016/j.schres.2005.08.008
159. Hayes JF, Picot S, Osborn DPJ, Lewis G, Dalman C, Lundin A. Visual Acuity in Late Adolescence and Future Psychosis Risk in a Cohort of 1 Million Men. *Schizophr Bull*. 2019;45(3):571-578. doi:10.1093/schbul/sby084



**A)**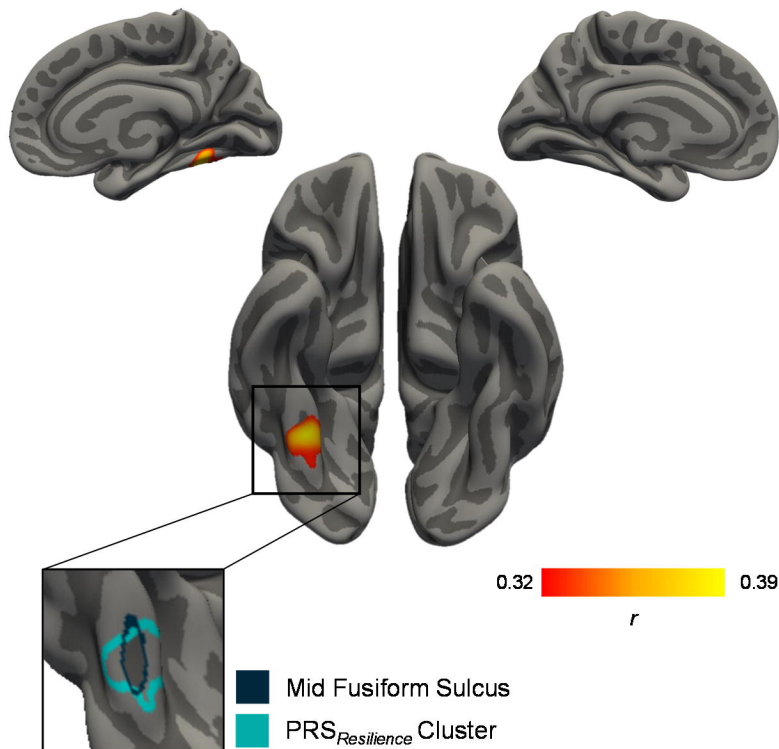**B)**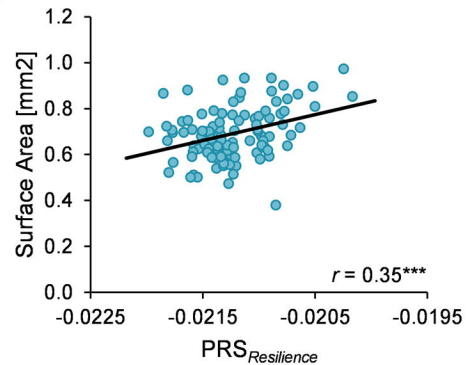**C)**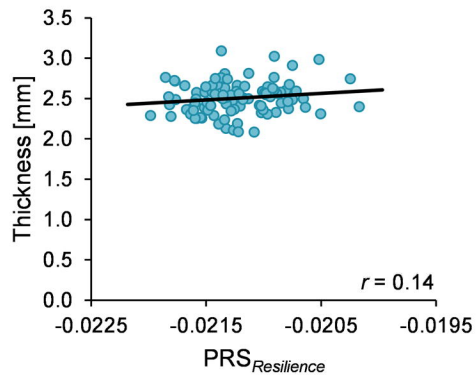

**A)**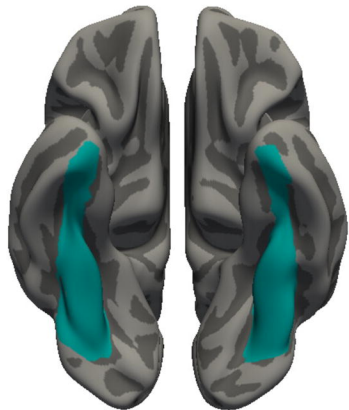**B)**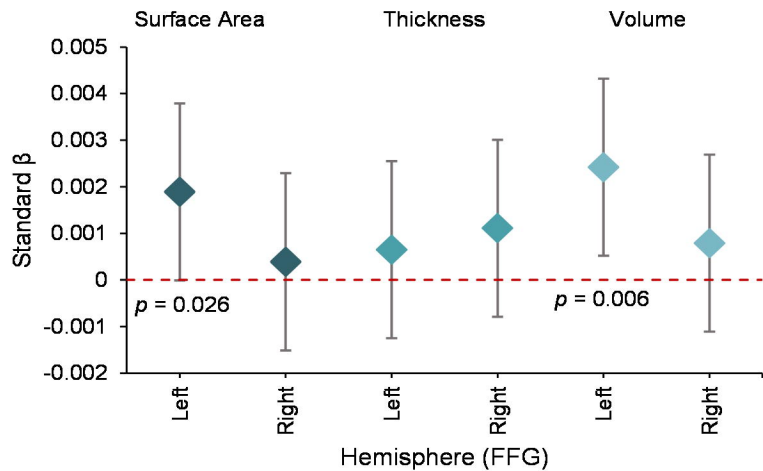**C)**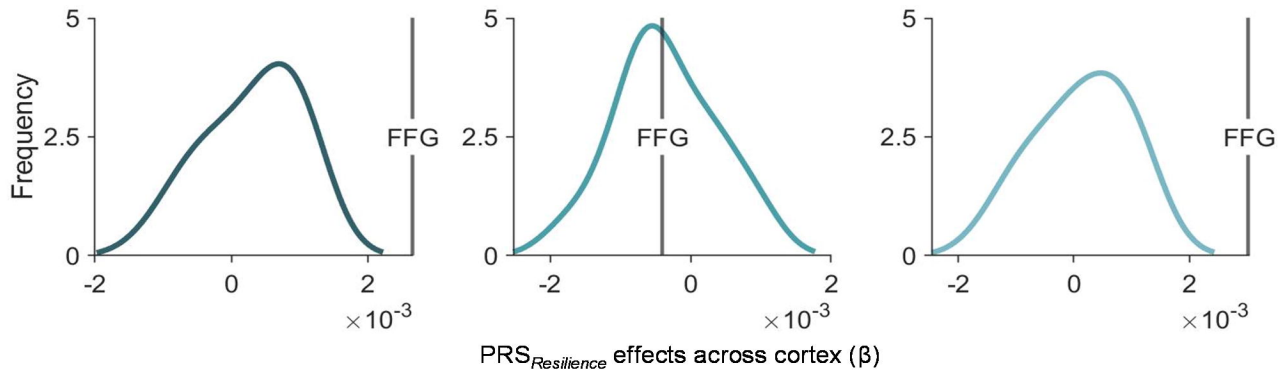

Source: https://www.medrxiv.org/content/medrxiv/early/2021/11/28/2021.07.23.21261045.full.pdf
